# Supplementary material for: The Response of Plants and Mycorrhizal Fungi to Nutritionally-Heterogeneous Environments Are Regulated by Nutrient Types and Plant Functional Groups
Source: Front Plant Sci. 2021 Nov 15;12:734641. doi: 10.3389/fpls.2021.734641 (PMC8634332; doi:10.3389/fpls.2021.734641)
Supplement: Supplementary Appendix 1 — Dataset (excel file) on plant biomass allocation and root foraging strategy in the first dataset (heterogeneous nutrient vs. homogeneous nutrient control), and foraging strategy of roots and mycorrhizal fungi and their relationship with root diameter for woody species in the second dataset (heterogeneous nutrient patch vs. unfertilized control). AM: arbuscular mycorrhizal fungi; ECM: ectomycorrhizal fungi. [file Table_1.XLSX]

## Sheet: All species
	Herbaceous species (90 species)	Functional groups		Woody species (52 species)	Mycorrhizal types
	Abutilon theophrasti	Forb		Acer fabri	AM	43 AM + 9 ECM
	Achillea millefolium	Forb		Acer negundo	AM
	Achillea ptarmica	Forb		Acer rubrum	AM
	Alternanthera philoxeroides	Forb		Acer saccharum	AM
	Arabidopsis thaliana	Forb		Ailanthus altissima	AM
	Artemisia tridentata	Forb		Albizia guachapele	AM
	Balsamorhiza sagittata	Forb		Alniphyllum fortunei	AM
	Brassica napus	Forb		Berberis thunbergii	AM
	Callistephus chinensis	Forb		Cedrela odorata	AM
	Campanula rotundifolia	Forb		Ceiba pentandra	AM
	Cardamine hirsuta	Forb		Choerospondias axillaris	AM
	Centaurea diffusa	Forb		Cinnamomum austrosinense	AM
	Chenopodium glaucum	Forb		Cinnamomum porrectum	AM
	Chondrilla juncea	Forb		Cordia alliodora	AM
	Crepis intermedia	Forb		Cunninghamia lanceolata	AM
	Desmodium strictum	Forb		Dalbergia retusa	AM
	Dianthus barbatus	Forb		Diospyros virginiana	AM
	Elephantopus tomentosus	Forb		Elaeocarpus glabripetalus	AM
	Erechtites hieracifolia	Forb		Euonymus americanus	AM
	Erigeron canadensis	Forb		Fraxinus americana	AM
	Eupatorium compositifolium	Forb		Fraxinus pennsylvanica	AM
	Glechoma hederacea	Forb		Gliricidia sepium	AM
	Gypsophila paniculata	Forb		Juglans nigra	AM
	Hydrocotyle vulgaris	Forb		Lindera benzoin	AM
	Hypericum gentianoides	Forb		Liquidambar formosana	AM
	Hypericum perforatum	Forb		Liquidambar styraciflua	AM
	Inula viscosa	Forb		Liriodendron chinese	AM
	Ipomoea tricolor	Forb		Liriodendron tulipifera	AM
	Linaria dalmatica	Forb		Lonicera maackii	AM
	Nepeta mussini	Forb		Machilus oculodracontis	AM
	Nicotiana tabacum	Forb		Magnolia acuminata	AM
	Papaver rhoeas	Forb		Manglietia yuyuanensis	AM
	Perilla frutescens	Forb		Neolitsea phanerophlebia	AM
	Phlox longifolia	Forb		Nyssa aquatica	AM
	Plantago lanceolata	Forb		Prosopis glandulosa	AM
	Pseudoroegenaria spicata	Forb		Prunus serotina	AM
	Ranunculus bulbosus	Forb		Rubus allegheniensis	AM
	Ranunculus repens	Forb		Rubus phoenicolasius	AM
	Rumex palustris	Forb		Sassafras albidum	AM
	Rumex thyrsiflorus	Forb		Schima superba	AM
	Saponaria ocymoides	Forb		Taxus chinensis	AM
	Solanum tuberosum	Forb		Ulmus americana	AM
	Solidago altissima	Forb		Vibernum dentatum	AM
	Solidago canadensis	Forb		Betula alleghaniensis	ECM
	Solidago nemoralis	Forb		Betula lenta	ECM
	Sonchus oleraceus	Forb		Betula papyrifera	ECM
	Viola odorata	Forb		Carya glabra	ECM
	Achnatherum thurberianum	Grass		Picea rubens	ECM
	Agropyron desertorum	Grass		Pinus strobus	ECM
	Andropogon ternarius	Grass		Pinus virginiana	ECM
	Anthoxanthum odoratum	Grass		Quercus alba	ECM
	Arrhenatherum elatius	Grass		Quercus rubra	ECM
	Briza media	Grass
	Chloris virgate	Grass
	Dactylis glomerata	Grass
	Festuca arundinacea	Grass
	Festuca glauca	Grass
	Festuca idahoensis	Grass
	Festuca ovina	Grass
	Festuca rubra	Grass
	Holcus lanatus	Grass
	Koeleria glauca	Grass
	Lolium perenne	Grass
	Lygeum spartum	Grass
	Neyraudia reynaudiana	Grass
	Oryza sativa	Grass
	Pennisetum clandestinum	Grass
	Phleum pratense	Grass
	Poa pratensis	Grass
	Poa trivialis	Grass
	Sasa argenteosriata	Grass
	Sasaella glabra	Grass
	Triticum aestivum	Grass
	Triticum durum	Grass
	Zea mays	Grass
	Anthyllis vulneraria	Legume
	Chamaecrista nictitans	Legume
	Cicer arietinum	Legume
	Dorycnium pentaphyllum	Legume
	Lotus corniculatus	Legume
	Lupinus albus	Legume
	Lupinus angustifolius	Legume
	Medicago lupulina	Legume
	Medicago sativa	Legume
	Melilotus officinalis	Legume
	Onobrychis viciifolia	Legume
	Trifolium pratense	Legume
	Trifolium repens	Legume
	Trifolium subterraneum	Legume
	Vicia faba	Legume

## Sheet: Dataset 1_Shoot biomass
Study	Year	Species	ln(RR)	VEZ	Nutrient types	Plant functional groups	Herbaceous species types	Experimental type
Blair	2001	Ipomoea tricolor	-0.0275632	0.000887306	NP	Herbaceous	Forb	Greenhouse
Blair	2001	Ipomoea tricolor	0.0265534	0.00235395	NP	Herbaceous	Forb	Greenhouse
Blouin & Puga-Freitas	2011	Arabidopsis thaliana	-0.186251	0.0644823	N	Herbaceous	Forb	Greenhouse
Blouin & Puga-Freitas	2011	Arabidopsis thaliana	-0.0537042	0.0660758	N	Herbaceous	Forb	Greenhouse
Blouin & Puga-Freitas	2011	Arabidopsis thaliana	0.231559	0.0184083	N	Herbaceous	Forb	Greenhouse
Blouin & Puga-Freitas	2011	Arabidopsis thaliana	0.26992	0.0405557	N	Herbaceous	Forb	Greenhouse
Blouin & Puga-Freitas	2011	Arabidopsis thaliana	0.157807	0.0126331	N	Herbaceous	Forb	Greenhouse
Blouin & Puga-Freitas	2011	Arabidopsis thaliana	-0.218879	0.0898085	N	Herbaceous	Forb	Greenhouse
Casper and Cahill	1998	Abutilon theophrasti	-0.188736	0.0119167	OF	Herbaceous	Forb	Greenhouse
Casper and Cahill	1998	Abutilon theophrasti	-0.112891	0.0126909	OF	Herbaceous	Forb	Greenhouse
Casper and Cahill	1998	Abutilon theophrasti	-0.0993883	0.00688267	OF	Herbaceous	Forb	Greenhouse
Casper and Cahill	1998	Abutilon theophrasti	-0.0164751	0.0119065	OF	Herbaceous	Forb	Greenhouse
Cui and Caldwell	1997	Artemisia tridentata	-0.0887715	0.031768	P	Herbaceous	Forb	Greenhouse
Cui and Caldwell	1997	Artemisia tridentata	-0.0197863	0.0126922	P	Herbaceous	Forb	Greenhouse
Day et al	2003a	Cardamine hirsuta	0.190439	0.0185414	NP	Herbaceous	Forb	Greenhouse
Day et al	2003a	Cardamine hirsuta	0.289421	0.0149664	NP	Herbaceous	Forb	Greenhouse
Day et al	2003a	Cardamine hirsuta	0.278894	0.0128081	NP	Herbaceous	Forb	Greenhouse
Dong et al	2015	Hydrocotyle vulgaris	-0.184734	0.011384	NP	Herbaceous	Forb	Greenhouse
Dong et al	2015	Hydrocotyle vulgaris	-0.101353	0.00831086	NP	Herbaceous	Forb	Greenhouse
Garcia-Palacios et al	2011	Achillea millefolium + Dianthus barbatus + Gypsophila paniculata + Hypericum perforatum + Inula viscosa + Nepeta mussini + Plantago lanceolata + Saponaria ocymoides + Viola odorata	0.157628	0.013833	OF	Herbaceous	Forb	Greenhouse
Garcia-Palacios et al	2011	Achillea millefolium + Dianthus barbatus + Gypsophila paniculata + Hypericum perforatum + Inula viscosa + Nepeta mussini + Plantago lanceolata + Saponaria ocymoides + Viola odorata	0.139529	0.0366177	OF	Herbaceous	Forb	Greenhouse
Garcia-Palacios et al	2011	Achillea millefolium + Dianthus barbatus + Gypsophila paniculata + Hypericum perforatum + Inula viscosa + Nepeta mussini + Plantago lanceolata + Saponaria ocymoides + Viola odorata	-0.223144	0.06596	OF	Herbaceous	Forb	Greenhouse
Hagiwara et al	2012	Perilla frutescens	-0.329753	0.00210774	NP	Herbaceous	Forb	Greenhouse
Hutchings and Wijesinghe	2008	Glechoma hederacea	0.222411	0.0232193	OF	Herbaceous	Forb	Greenhouse
Hutchings and Wijesinghe	2008	Glechoma hederacea	0.320118	0.0233913	OF	Herbaceous	Forb	Greenhouse
Hutchings and Wijesinghe	2008	Glechoma hederacea	0.120628	0.0228684	OF	Herbaceous	Forb	Greenhouse
Hutchings and Wijesinghe	2008	Glechoma hederacea	0.0324335	0.0515076	OF	Herbaceous	Forb	Greenhouse
Hutchings and Wijesinghe	2008	Glechoma hederacea	-0.0960436	0.0199436	OF	Herbaceous	Forb	Greenhouse
Hutchings and Wijesinghe	2008	Glechoma hederacea	-0.521876	0.0892305	OF	Herbaceous	Forb	Greenhouse
Hutchings and Wijesinghe	2008	Glechoma hederacea	-0.0880116	0.0489371	OF	Herbaceous	Forb	Greenhouse
Hutchings and Wijesinghe	2008	Glechoma hederacea	-0.0335239	0.0361924	OF	Herbaceous	Forb	Greenhouse
Hutchings and Wijesinghe	2008	Glechoma hederacea	-0.0184861	0.054189	OF	Herbaceous	Forb	Greenhouse
Hutchings and Wijesinghe	2008	Glechoma hederacea	-0.158435	0.052762	OF	Herbaceous	Forb	Greenhouse
Jansen et al	2006	Rumex palustris	-0.0133037	0.00119512	NP	Herbaceous	Forb	Greenhouse
Jansen et al.	2006	Rumex palustris	0.0651382	0.00286424	NP	Herbaceous	Forb	Greenhouse
Lamb et al	2004	Abutilon theophrasti	0.338697	0.00185215	OF	Herbaceous	Forb	Greenhouse
Lamb et al	2004	Abutilon theophrasti	0.405598	0.00172398	OF	Herbaceous	Forb	Greenhouse
Lamb et al	2004	Abutilon theophrasti	0.158082	0.00206454	OF	Herbaceous	Forb	Greenhouse
Maestre and Reynolds	2007	Plantago lanceolata	0.510839	0.00834306	OF	Herbaceous	Forb	Greenhouse
Maestre and Reynolds	2007	Plantago lanceolata	0.349874	0.0121911	OF	Herbaceous	Forb	Greenhouse
Maestre and Reynolds	2006b	Plantago lanceolata	0.550046	0.0177581	OF	Herbaceous	Forb	Greenhouse
Maestre and Reynolds	2006b	Plantago lanceolata	0.66416	0.0150076	OF	Herbaceous	Forb	Greenhouse
Maestre and Reynolds	2006b	Plantago lanceolata	0.594707	0.00509531	OF	Herbaceous	Forb	Greenhouse
Maestre and Reynolds	2006b	Plantago lanceolata	1.17118	0.0404146	OF	Herbaceous	Forb	Greenhouse
Maestre et al	2006	Plantago lanceolata	1.19501	0.213589	OF	Herbaceous	Forb	Greenhouse
Maestre et al	2006	Plantago lanceolata	1.54044	0.180075	OF	Herbaceous	Forb	Greenhouse
Maestre et al	2006	Plantago lanceolata	1.36737	0.518911	OF	Herbaceous	Forb	Greenhouse
Maestre et al	2006	Plantago lanceolata	1.2646	0.2359	OF	Herbaceous	Forb	Greenhouse
Maestre et al	2006	Plantago lanceolata	0.208753	0.238451	OF	Herbaceous	Forb	Greenhouse
Maestre et al	2006	Plantago lanceolata	1.24319	0.380104	OF	Herbaceous	Forb	Greenhouse
Maestre et al	2006	Plantago lanceolata	0.628609	0.43228	OF	Herbaceous	Forb	Greenhouse
Maestre et al	2006	Plantago lanceolata	0.69315	0.295263	OF	Herbaceous	Forb	Greenhouse
Maestre et al	2006	Plantago lanceolata	1.21227	0.231148	OF	Herbaceous	Forb	Greenhouse
Maestre et al	2006	Plantago lanceolata	0.223142	0.233461	OF	Herbaceous	Forb	Greenhouse
Maestre et al	2007	Plantago lanceolata	0.359374	0.00861782	OF	Herbaceous	Forb	Greenhouse
Maestre et al	2007	Plantago lanceolata	0.496437	0.0244238	OF	Herbaceous	Forb	Greenhouse
Maestre et al	2007	Plantago lanceolata	0.530628	0.00603157	OF	Herbaceous	Forb	Greenhouse
Maestre et al	2007	Plantago lanceolata	0.80188	0.0339972	OF	Herbaceous	Forb	Greenhouse
Visser et al	2008	Nicotiana tabacum	-0.0793367	0.00325691	N	Herbaceous	Forb	Greenhouse
Visser et al	2008	Nicotiana tabacum	-0.137784	0.00818692	N	Herbaceous	Forb	Greenhouse
Visser et al	2008	Nicotiana tabacum	-0.0422004	0.00918411	P	Herbaceous	Forb	Greenhouse
Visser et al	2008	Nicotiana tabacum	0.0566189	0.0296582	P	Herbaceous	Forb	Greenhouse
Wang et al	2007	Brassica napus	0.0771165	0.00501471	NP	Herbaceous	Forb	Greenhouse
Wang et al	2007	Brassica napus	0.027588	0.00402792	NP	Herbaceous	Forb	Greenhouse
Wijesinghe et al	2001	Papaver rhoeas	-0.0963339	0.0411182	NP	Herbaceous	Forb	Greenhouse
Wijesinghe et al	2001	Papaver rhoeas	0.0797147	0.0518804	NP	Herbaceous	Forb	Greenhouse
Wijesinghe et al	2001	Plantago lanceolata	-0.0523684	0.0186301	NP	Herbaceous	Forb	Greenhouse
Wijesinghe et al	2001	Plantago lanceolata	0	0.0121107	NP	Herbaceous	Forb	Greenhouse
Wijesinghe et al	2001	Sonchus oleraceus	0.0288193	0.0371366	NP	Herbaceous	Forb	Greenhouse
Wijesinghe et al	2001	Sonchus oleraceus	-0.071171	0.0654064	NP	Herbaceous	Forb	Greenhouse
Wijesinghe et al	2001	Campanula rotundifolia	-0.176382	0.0377263	NP	Herbaceous	Forb	Greenhouse
Wijesinghe et al	2001	Campanula rotundifolia	0.125263	0.0436124	NP	Herbaceous	Forb	Greenhouse
Wu et al	2014	Solanum tuberosum	0.150823	0.0150528	N	Herbaceous	Forb	Field
Wu et al	2014	Solanum tuberosum	0.0566203	0.0198214	N	Herbaceous	Forb	Field
Wu et al	2014	Solanum tuberosum	0.122955	0.0196676	N	Herbaceous	Forb	Greenhouse
Cui and Caldwell	1997	Agropyron desertorum	0.0718825	0.0166111	P	Herbaceous	Grass	Greenhouse
Cui and Caldwell	1997	Agropyron desertorum	-0.177004	0.0143832	P	Herbaceous	Grass	Greenhouse
Cui and Caldwell	1996a	Agropyron desertorum	-0.0153209	0.0632768	NP	Herbaceous	Grass	Greenhouse
Cui and Caldwell	1996a	Agropyron desertorum	-0.110388	0.0255898	NP	Herbaceous	Grass	Greenhouse
Cui and Caldwell	1996b	Agropyron desertorum	-0.0225461	0.0130551	NP	Herbaceous	Grass	Greenhouse
Cui and Caldwell	1996b	Agropyron desertorum	0.150628	0.00832491	NP	Herbaceous	Grass	Greenhouse
Day et al	2003b	Briza media	0.0134204	0.00711345	NP	Herbaceous	Grass	Greenhouse
Day et al	2003b	Briza media	-0.249764	0.00433181	NP	Herbaceous	Grass	Greenhouse
Day et al	2003b	Briza media	-0.0254486	0.00586299	NP	Herbaceous	Grass	Greenhouse
Day et al	2003b	Festuca ovina	0.269663	0.0169205	NP	Herbaceous	Grass	Greenhouse
Day et al	2003b	Festuca ovina	0.425549	0.00661899	NP	Herbaceous	Grass	Greenhouse
Day et al	2003b	Festuca ovina	-0.457581	0.00492543	NP	Herbaceous	Grass	Greenhouse
Fransen et al	2001	Anthoxanthum odoratum	-0.066665	0.0143455	N	Herbaceous	Grass	Greenhouse
Fransen et al	2001	Anthoxanthum odoratum	0.184314	0.0139396	N	Herbaceous	Grass	Greenhouse
Fransen et al	2001	Festuca rubra	-0.0834015	0.00729845	N	Herbaceous	Grass	Greenhouse
Fransen et al	2001	Festuca rubra	-0.125728	0.0189151	N	Herbaceous	Grass	Greenhouse
Garcia-Palacios et al	2011	Dactylis glomerata + Festuca glauca + Koeleria glauca + Lolium perenne + Lygeum spartum + Pennisetum clandestinum + Phleum pratense + Poa pratensis + Poa trivialis	0.0520568	0.00467078	OF	Herbaceous	Grass	Greenhouse
Garcia-Palacios et al	2011	Dactylis glomerata + Festuca glauca + Koeleria glauca + Lolium perenne + Lygeum spartum + Pennisetum clandestinum + Phleum pratense + Poa pratensis + Poa trivialis	0.249999	0.0485585	OF	Herbaceous	Grass	Greenhouse
Garcia-Palacios et al	2011	Dactylis glomerata + Festuca glauca + Koeleria glauca + Lolium perenne + Lygeum spartum + Pennisetum clandestinum + Phleum pratense + Poa pratensis + Poa trivialis	0.255347	0.0346184	OF	Herbaceous	Grass	Greenhouse
He et al	2012	Triticum aestivum	0.173951	0.00613348	NP	Herbaceous	Grass	Greenhouse
He et al	2012	Triticum aestivum	0.0568886	0.00449676	NP	Herbaceous	Grass	Greenhouse
He et al	2012	Triticum aestivum	0.0800413	0.000569324	NP	Herbaceous	Grass	Greenhouse
He et al	2012	Triticum aestivum	-0.0532842	0.000817859	NP	Herbaceous	Grass	Greenhouse
He et al	2012	Triticum aestivum	0.0172399	0.00215678	NP	Herbaceous	Grass	Greenhouse
He et al	2012	Triticum aestivum	-0.0283024	0.000292147	NP	Herbaceous	Grass	Greenhouse
He et al	2012	Triticum aestivum	0.333144	0.0850222	NP	Herbaceous	Grass	Greenhouse
He et al	2012	Triticum aestivum	-0.0350944	0.000253353	NP	Herbaceous	Grass	Greenhouse
He et al	2012	Triticum aestivum	-0.693146	0.111062	NP	Herbaceous	Grass	Greenhouse
He et al	2012	Triticum aestivum	-0.0390522	0.000826817	NP	Herbaceous	Grass	Greenhouse
He et al	2012	Triticum aestivum	-0.0674427	0.00127752	NP	Herbaceous	Grass	Greenhouse
He et al	2012	Triticum aestivum	-0.0225745	0.00332289	NP	Herbaceous	Grass	Greenhouse
He et al	2012	Triticum aestivum	0.0349534	0.00147713	NP	Herbaceous	Grass	Greenhouse
He et al	2012	Triticum aestivum	0.106972	0.0101906	NP	Herbaceous	Grass	Greenhouse
He et al	2012	Triticum aestivum	-0.203402	0.00902429	NP	Herbaceous	Grass	Greenhouse
He et al.	2003	Oryza sativa	1.35955	0.00891432	P	Herbaceous	Grass	Greenhouse
He et al.	2003	Oryza sativa	0.00944599	0.0188587	P	Herbaceous	Grass	Greenhouse
He et al.	2003	Oryza sativa	0.951478	0.00497924	P	Herbaceous	Grass	Greenhouse
He et al.	2003	Oryza sativa	-0.10036	0.00544901	P	Herbaceous	Grass	Greenhouse
Hodge et al	1998	Dactylis glomerata	-0.577805	0.0456844	OF	Herbaceous	Grass	Greenhouse
Hodge et al	1998	Festuca arundinacea	-0.274845	0.0204943	OF	Herbaceous	Grass	Greenhouse
Hodge et al	1998	Lolium perenne	-0.0257084	0.0828806	OF	Herbaceous	Grass	Greenhouse
Hodge et al	1998	Phleum pratense	-0.583713	0.102968	OF	Herbaceous	Grass	Greenhouse
Hodge et al	1998	Poa pratensis	-0.675551	0.0803551	OF	Herbaceous	Grass	Greenhouse
Jing et al	2010	Zea mays	0.405465	0.0100309	NP	Herbaceous	Grass	Field
Jing et al	2010	Zea mays	0.154151	0.0120465	N	Herbaceous	Grass	Field
Jing et al	2010	Zea mays	0.182322	0.0169444	NP	Herbaceous	Grass	Field
Jing et al	2010	Zea mays	0	0.02	N	Herbaceous	Grass	Field
Jing et al	2010	Zea mays	0.0416727	0.0109915	NP	Herbaceous	Grass	Field
Jing et al	2010	Zea mays	0	0.0113173	N	Herbaceous	Grass	Field
Jing et al	2010	Zea mays	-0.00858374	0.00534413	NP	Herbaceous	Grass	Field
Jing et al	2010	Zea mays	0.0581076	0.00493543	N	Herbaceous	Grass	Field
Lamb et al	2012	Poa pratensis	-0.537586	0.267884	NP	Herbaceous	Grass	Greenhouse
Lamb et al	2012	Poa pratensis	-0.538997	0.321397	NP	Herbaceous	Grass	Greenhouse
Lamb et al	2012	Poa pratensis	-0.607992	0.14355	NP	Herbaceous	Grass	Greenhouse
Lamb et al	2012	Poa pratensis	-0.287684	0.0644138	NP	Herbaceous	Grass	Greenhouse
Lamb et al	2012	Poa pratensis	-0.723304	0.167534	NP	Herbaceous	Grass	Greenhouse
Lamb et al	2012	Poa pratensis	-0.364643	0.166638	NP	Herbaceous	Grass	Greenhouse
Lamb et al	2012	Poa pratensis	-1.03408	0.126611	NP	Herbaceous	Grass	Greenhouse
Lamb et al	2012	Poa pratensis	-0.559617	0.12261	NP	Herbaceous	Grass	Greenhouse
Li et al	2014	Triticum aestivum	0.014478	0.00515291	N	Herbaceous	Grass	Greenhouse
Li et al	2014	Triticum aestivum	-0.0657739	0.0034711	P	Herbaceous	Grass	Greenhouse
Li et al	2014	Triticum aestivum	-0.0437681	0.00640531	NP	Herbaceous	Grass	Greenhouse
Li et al	2014	Zea mays	-0.025558	0.0124864	N	Herbaceous	Grass	Greenhouse
Li et al	2014	Zea mays	-0.0689451	0.00311382	P	Herbaceous	Grass	Greenhouse
Li et al	2014	Zea mays	0.0293862	0.00230482	NP	Herbaceous	Grass	Greenhouse
Loecke and Robertson	2009	Zea mays	0.116797	0.00146427	OF	Herbaceous	Grass	Greenhouse
Loecke and Robertson	2009	Zea mays	0.140146	0.00190299	OF	Herbaceous	Grass	Greenhouse
Loecke and Robertson	2009	Zea mays	-0.0475233	0.00326359	OF	Herbaceous	Grass	Greenhouse
Loecke and Robertson	2009	Zea mays	0.0762844	0.00520061	OF	Herbaceous	Grass	Greenhouse
Loecke and Robertson	2009	Zea mays	0	0.00193334	OF	Herbaceous	Grass	Greenhouse
Loecke and Robertson	2009	Zea mays	0.183337	0.00226621	OF	Herbaceous	Grass	Greenhouse
Loecke and Robertson	2009	Zea mays	0.0947451	0.0141994	OF	Herbaceous	Grass	Greenhouse
Loecke and Robertson	2009	Zea mays	0.0947451	0.0077198	OF	Herbaceous	Grass	Greenhouse
Loecke and Robertson	2009	Zea mays	0.2318	0.00735194	OF	Herbaceous	Grass	Greenhouse
Ma et al	2011	Triticum aestivum	1.31567	0.0158866	P	Herbaceous	Grass	Greenhouse
Maestre and Reynolds	2007	Holcus lanatus	0.246305	0.0150502	OF	Herbaceous	Grass	Greenhouse
Maestre and Reynolds	2007	Holcus lanatus	0.164822	0.00318792	OF	Herbaceous	Grass	Greenhouse
Maestre and Reynolds	2007	Lolium perenne	0.360501	0.0114596	OF	Herbaceous	Grass	Greenhouse
Maestre and Reynolds	2007	Lolium perenne	0.466251	0.054072	OF	Herbaceous	Grass	Greenhouse
Maestre and Reynolds	2006b	Lolium perenne	0.594707	0.00509531	OF	Herbaceous	Grass	Greenhouse
Maestre and Reynolds	2006b	Lolium perenne	0.666479	0.0210245	OF	Herbaceous	Grass	Greenhouse
Maestre and Reynolds	2006b	Lolium perenne	0.659246	0.0472506	OF	Herbaceous	Grass	Greenhouse
Maestre and Reynolds	2006b	Lolium perenne	0.885519	0.0482645	OF	Herbaceous	Grass	Greenhouse
Maestre and Reynolds	2006b	Holcus lanatus	0.27029	0.0217951	OF	Herbaceous	Grass	Greenhouse
Maestre and Reynolds	2006b	Holcus lanatus	0.545511	0.00361277	OF	Herbaceous	Grass	Greenhouse
Maestre and Reynolds	2006b	Holcus lanatus	0.207639	0.0065361	OF	Herbaceous	Grass	Greenhouse
Maestre and Reynolds	2006b	Holcus lanatus	0.275706	0.00459012	OF	Herbaceous	Grass	Greenhouse
Maestre et al	2006	Lolium perenne	1.80555	0.127346	OF	Herbaceous	Grass	Greenhouse
Maestre et al	2006	Lolium perenne	2.22848	0.553198	OF	Herbaceous	Grass	Greenhouse
Maestre et al	2006	Lolium perenne	1.3618	0.153294	OF	Herbaceous	Grass	Greenhouse
Maestre et al	2006	Lolium perenne	1.49392	0.604553	OF	Herbaceous	Grass	Greenhouse
Maestre et al	2006	Lolium perenne	0.255935	0.111132	OF	Herbaceous	Grass	Greenhouse
Maestre et al	2006	Lolium perenne	1.18959	0.581361	OF	Herbaceous	Grass	Greenhouse
Maestre et al	2006	Lolium perenne	-0.138152	0.237121	OF	Herbaceous	Grass	Greenhouse
Maestre et al	2006	Lolium perenne	-0.20067	0.479772	OF	Herbaceous	Grass	Greenhouse
Maestre et al	2006	Lolium perenne	1.97202	0.0768366	OF	Herbaceous	Grass	Greenhouse
Maestre et al	2006	Lolium perenne	0.554312	0.0506125	OF	Herbaceous	Grass	Greenhouse
Maestre et al	2006	Poa pratensis	0.287681	0.173684	OF	Herbaceous	Grass	Greenhouse
Maestre et al	2006	Poa pratensis	0.510826	0.271222	OF	Herbaceous	Grass	Greenhouse
Maestre et al	2006	Poa pratensis	-0.0732032	0.0297386	OF	Herbaceous	Grass	Greenhouse
Maestre et al	2006	Poa pratensis	0.259752	0.302467	OF	Herbaceous	Grass	Greenhouse
Maestre et al	2006	Poa pratensis	0.0588403	0.0298988	OF	Herbaceous	Grass	Greenhouse
Maestre et al	2006	Poa pratensis	-0.547006	0.308914	OF	Herbaceous	Grass	Greenhouse
Maestre et al	2006	Poa pratensis	0.172469	0.060004	OF	Herbaceous	Grass	Greenhouse
Maestre et al	2006	Poa pratensis	0.163786	0.162672	OF	Herbaceous	Grass	Greenhouse
Maestre et al	2006	Poa pratensis	-0.188401	0.0328363	OF	Herbaceous	Grass	Greenhouse
Maestre et al	2006	Poa pratensis	-0.487414	0.372121	OF	Herbaceous	Grass	Greenhouse
Maestre et al	2007	Lolium perenne	0.36179	0.00878706	OF	Herbaceous	Grass	Greenhouse
Maestre et al	2007	Lolium perenne	0.420503	0.00773933	OF	Herbaceous	Grass	Greenhouse
Maestre et al	2007	Lolium perenne	0.476924	0.0551519	OF	Herbaceous	Grass	Greenhouse
Maestre et al	2007	Lolium perenne	0.620025	0.0187555	OF	Herbaceous	Grass	Greenhouse
Maestre et al	2007	Holcus lanatus	0.240141	0.0150812	OF	Herbaceous	Grass	Greenhouse
Maestre et al	2007	Holcus lanatus	0.289589	0.0014086	OF	Herbaceous	Grass	Greenhouse
Maestre et al	2007	Holcus lanatus	0.171272	0.00330388	OF	Herbaceous	Grass	Greenhouse
Maestre et al	2007	Holcus lanatus	0.206004	0.00390399	OF	Herbaceous	Grass	Greenhouse
Nakamura et al	2008	Lolium perenne	-0.519486	0.174184	NP	Herbaceous	Grass	Greenhouse
Nakamura et al	2008	Lolium perenne	-0.56942	0.0558473	NP	Herbaceous	Grass	Greenhouse
Nakamura et al	2008	Lolium perenne	-0.813681	0.0883029	NP	Herbaceous	Grass	Greenhouse
Nakamura et al	2008	Lolium perenne	-1.33124	0.0758446	NP	Herbaceous	Grass	Greenhouse
Schortemeyer and Feil	1996	Zea mays	-0.142873	0.00311768	N	Herbaceous	Grass	Greenhouse
Schortemeyer and Feil	1996	Zea mays	-0.134671	0.00291488	N	Herbaceous	Grass	Greenhouse
Schortemeyer and Feil	1996	Zea mays	-0.0822861	0.00429356	N	Herbaceous	Grass	Greenhouse
Si et al	2021	Sasa argenteosriata	0.597837	0.0730576	OF	Herbaceous	Grass	Greenhouse
Si et al	2021	Sasaella glabra	0.693146	0.0401221	OF	Herbaceous	Grass	Greenhouse
Trapeznikov et al	2003	Triticum durum	0.675129	0.0388672	NP	Herbaceous	Grass	Field
Trapeznikov et al	2003	Triticum durum	0.416516	0.0111948	NP	Herbaceous	Grass	Field
Trapeznikov et al	2003	Triticum durum	0.313662	0.00918344	NP	Herbaceous	Grass	Field
Wijesinghe et al	2001	Arrhenatherum elatius	-0.0157485	0.00584894	NP	Herbaceous	Grass	Greenhouse
Wijesinghe et al	2001	Arrhenatherum elatius	-0.0317491	0.00603762	NP	Herbaceous	Grass	Greenhouse
Wijesinghe et al	2001	Festuca ovina	0.00838682	0.018808	NP	Herbaceous	Grass	Greenhouse
Wijesinghe et al	2001	Festuca ovina	0.00838682	0.0185347	NP	Herbaceous	Grass	Greenhouse
Wu et al	2014	Zea mays	0.236387	0.0288583	N	Herbaceous	Grass	Field
Wu et al	2014	Zea mays	-0.144248	0.0368437	N	Herbaceous	Grass	Field
Wu et al	2014	Zea mays	0.00750742	0.00855348	N	Herbaceous	Grass	Greenhouse
Zhang et al	2016	Zea mays	0.763531	0.17852	P	Herbaceous	Grass	Greenhouse
Facelli and Facelli	2002	Trifolium subterraneum	0.176706	0.0184447	P	Herbaceous	Legume	Greenhouse
Felderer et al	2013	Lotus corniculatus	-0.251315	0.0415533	P	Herbaceous	Legume	Greenhouse
Felderer et al	2013	Lotus corniculatus	0.00751951	0.061694	P	Herbaceous	Legume	Greenhouse
Felderer et al	2013	Lotus corniculatus	-0.0606251	0.0447538	P	Herbaceous	Legume	Greenhouse
Felderer et al	2013	Lotus corniculatus	0.51368	0.0795552	P	Herbaceous	Legume	Greenhouse
Felderer et al	2013	Lotus corniculatus	-0.087011	0.157732	P	Herbaceous	Legume	Greenhouse
Felderer et al	2013	Lotus corniculatus	0.96035	0.148062	P	Herbaceous	Legume	Greenhouse
Garcia-Palacios et al	2011	Anthyllis vulneraria + Dorycnium pentaphyllum + Lotus corniculatus + Medicago lupulina + Medicago sativa + Melilotus officinalis + Onobrychis viciifolia + Trifolium pratense + Trifolium repens	0.0422005	0.00698806	OF	Herbaceous	Legume	Greenhouse
Garcia-Palacios et al	2011	Anthyllis vulneraria + Dorycnium pentaphyllum + Lotus corniculatus + Medicago lupulina + Medicago sativa + Melilotus officinalis + Onobrychis viciifolia + Trifolium pratense + Trifolium repens	0.504405	0.0315289	OF	Herbaceous	Legume	Greenhouse
Garcia-Palacios et al	2011	Anthyllis vulneraria + Dorycnium pentaphyllum + Lotus corniculatus + Medicago lupulina + Medicago sativa + Melilotus officinalis + Onobrychis viciifolia + Trifolium pratense + Trifolium repens	0.522695	0.0495095	OF	Herbaceous	Legume	Greenhouse
Li et al	2014	Cicer arietinum	-0.071641	0.0015876	N	Herbaceous	Legume	Greenhouse
Li et al	2014	Cicer arietinum	-0.218485	0.00265509	P	Herbaceous	Legume	Greenhouse
Li et al	2014	Cicer arietinum	-0.103106	0.00129849	NP	Herbaceous	Legume	Greenhouse
Li et al	2014	Vicia faba	0.0545681	0.00381661	N	Herbaceous	Legume	Greenhouse
Li et al	2014	Vicia faba	-0.0120759	0.00432009	P	Herbaceous	Legume	Greenhouse
Li et al	2014	Vicia faba	0.00988476	0.00647911	NP	Herbaceous	Legume	Greenhouse
Ma et al	2011	Lupinus albus	0.634924	0.0104704	P	Herbaceous	Legume	Greenhouse
Blair and Perfecto	2004	Albizia guachapele	-0.328895	0.0576177	P	Woody		Greenhouse
Blair and Perfecto	2004	Cedrela odorata	0.24686	0.0216263	P	Woody		Greenhouse
Blair and Perfecto	2004	Ceiba pentandra	-0.119889	0.0313286	P	Woody		Greenhouse
Blair and Perfecto	2004	Cordia alliodora	0.579988	0.0442527	P	Woody		Greenhouse
Blair and Perfecto	2004	Dalbergia retusa	0	0.015614	P	Woody		Greenhouse
Blair and Perfecto	2004	Gliricidia sepium	0.331729	0.0162126	P	Woody		Greenhouse
Crabtree and Bazzaz	1992	Betula lenta	-0.308087	0.0103067	N	Woody		Greenhouse
Gloser et al	2008	Acer rubrum	-0.229043	0.00814162	N	Woody		Greenhouse
Gloser et al	2008	Betula papyrifera	0.123298	0.00680989	N	Woody		Greenhouse
Maestre and Reynolds	2006a	Prosopis glandulosa	0.0501781	0.0548895	NP	Woody		Greenhouse
Maestre and Reynolds	2006a	Prosopis glandulosa	-0.209094	0.0502711	NP	Woody		Greenhouse
Maestre and Reynolds	2006a	Prosopis glandulosa	-0.0588764	0.0559322	NP	Woody		Greenhouse
Maestre and Reynolds	2006a	Prosopis glandulosa	-0.00286327	0.0951659	NP	Woody		Greenhouse
Maestre and Reynolds	2006a	Prosopis glandulosa	-0.50645	0.0703921	NP	Woody		Greenhouse
Maestre and Reynolds	2006a	Prosopis glandulosa	-0.254324	0.0315144	N	Woody		Greenhouse
Maestre and Reynolds	2006a	Prosopis glandulosa	-0.299307	0.0630979	N	Woody		Greenhouse
Maestre and Reynolds	2006a	Prosopis glandulosa	-0.435021	0.0736076	P	Woody		Greenhouse
Maestre and Reynolds	2006a	Prosopis glandulosa	-0.199034	0.0862543	P	Woody		Greenhouse
Mou et al	1997	Liquidambar styraciflua	0.0357705	0.0384528	NP	Woody		Greenhouse
Mou et al	1997	Liquidambar styraciflua	-0.309212	0.0241639	NP	Woody		Greenhouse
Neatrour et al	2007	Fraxinus pennsylvanica	0.583144	0.0882775	NP	Woody		Greenhouse
Neatrour et al	2007	Fraxinus pennsylvanica	0.182323	0.0343017	NP	Woody		Greenhouse
Neatrour et al	2007	Fraxinus pennsylvanica	-0.271933	0.0708552	NP	Woody		Greenhouse
Neatrour et al	2007	Fraxinus pennsylvanica	0.481836	0.0437085	NP	Woody		Greenhouse
Neatrour et al	2007	Liquidambar styraciflua	0.260727	0.0350621	NP	Woody		Greenhouse
Neatrour et al	2007	Liquidambar styraciflua	-0.127835	0.157548	NP	Woody		Greenhouse
Neatrour et al	2007	Liquidambar styraciflua	0.218252	0.0426402	NP	Woody		Greenhouse
Neatrour et al	2007	Liquidambar styraciflua	-0.279582	0.0660656	NP	Woody		Greenhouse
Neatrour et al	2007	Nyssa aquatica	0.374691	0.0303104	NP	Woody		Greenhouse
Neatrour et al	2007	Nyssa aquatica	0.217414	0.0137084	NP	Woody		Greenhouse
Neatrour et al	2007	Nyssa aquatica	-0.271936	0.043546	NP	Woody		Greenhouse
Neatrour et al	2007	Nyssa aquatica	0.147324	0.0226946	NP	Woody		Greenhouse
van Vuuren et al	2003	Acer rubrum	-0.0861899	0.0037031	OF	Woody		Greenhouse
van Vuuren et al	2003	Betula papyrifera	-0.00880332	0.00265226	OF	Woody		Greenhouse
Zhang et al	2010	Liriodendron chinese	-0.311664	0.254525	NP	Woody		Greenhouse
Zhang et al	2010	Schima superba	0.959089	0.319542	NP	Woody		Greenhouse

## Sheet: Dataset 1_Root biomass
Study	Year	Species	ln(RR)	VEZ	Nutrient types	Plant functional groups	Herbaceous species types	Experimental type
Bliss et al	2002	Erechtites hieracifolia	-0.107887	0.0612268	NP	Herbaceous	Forb	Field
Bliss et al	2002	Hypericum gentianoides	0.0714578	0.0619974	NP	Herbaceous	Forb	Field
Bliss et al	2002	Solidago altissima	0.911061	0.0170775	NP	Herbaceous	Forb	Field
Blouin and Puga-Freitas	2011	Arabidopsis thaliana	-0.477856	0.07677	N	Herbaceous	Forb	Grasshouse
Blouin and Puga-Freitas	2011	Arabidopsis thaliana	-0.267405	0.0647329	N	Herbaceous	Forb	Grasshouse
Blouin and Puga-Freitas	2011	Arabidopsis thaliana	-0.0206193	0.0243144	N	Herbaceous	Forb	Grasshouse
Blouin and Puga-Freitas	2011	Arabidopsis thaliana	-0.138402	0.0307231	N	Herbaceous	Forb	Grasshouse
Blouin and Puga-Freitas	2011	Arabidopsis thaliana	-0.0940289	0.0261568	N	Herbaceous	Forb	Grasshouse
Blouin and Puga-Freitas	2011	Arabidopsis thaliana	-0.296266	0.123749	N	Herbaceous	Forb	Grasshouse
Casper and Cahill	1998	Abutilon theophrasti	0.922779	0.0527546	OF	Herbaceous	Forb	Greenhouse
Casper and Cahill	1998	Abutilon theophrasti	0.703667	0.0720275	OF	Herbaceous	Forb	Greenhouse
Casper and Cahill	1998	Abutilon theophrasti	0.699596	0.0440704	OF	Herbaceous	Forb	Greenhouse
Casper and Cahill	1998	Abutilon theophrasti	0.240371	0.0495702	OF	Herbaceous	Forb	Greenhouse
Day et al	2003a	Cardamine hirsuta	0.495322	0.0185414	NP	Herbaceous	Forb	Greenhouse
Day et al	2003a	Cardamine hirsuta	0.570546	0.0149664	NP	Herbaceous	Forb	Greenhouse
Day et al	2003a	Cardamine hirsuta	0.599119	0.0128081	NP	Herbaceous	Forb	Greenhouse
Dong et al	2015	Hydrocotyle vulgaris	-0.126415	0.0308142	NP	Herbaceous	Forb	Greenhouse
Dong et al	2015	Hydrocotyle vulgaris	0.0185752	0.0150647	NP	Herbaceous	Forb	Greenhouse
Garcia-Palacios et al	2011	Achillea millefolium + Dianthus barbatus + Gypsophila paniculata + Hypericum perforatum + Inula viscosa + Nepeta mussini + Plantago lanceolata + Saponaria ocymoides + Viola odorata	0.417161	0.0852252	OF	Herbaceous	Forb	Greenhouse
Garcia-Palacios et al	2011	Achillea millefolium + Dianthus barbatus + Gypsophila paniculata + Hypericum perforatum + Inula viscosa + Nepeta mussini + Plantago lanceolata + Saponaria ocymoides + Viola odorata	0.657429	0.0389659	OF	Herbaceous	Forb	Greenhouse
Jansen et al	2006	Rumex palustris	-0.0787437	0.0237807	NP	Herbaceous	Forb	Greenhouse
Jansen et al	2006	Rumex palustris	-0.103095	0.00790143	NP	Herbaceous	Forb	Greenhouse
Lamb et al	2004	Abutilon theophrasti	0.456019	0.00855457	OF	Herbaceous	Forb	Greenhouse
Lamb et al	2004	Abutilon theophrasti	0.558435	0.0107269	OF	Herbaceous	Forb	Greenhouse
Lamb et al	2004	Abutilon theophrasti	0.228091	0.0103496	OF	Herbaceous	Forb	Greenhouse
Maestre and Reynolds	2007	Plantago lanceolata	0.498396	0.0247173	OF	Herbaceous	Forb	Greenhouse
Maestre and Reynolds	2007	Plantago lanceolata	0.598554	0.0176828	OF	Herbaceous	Forb	Greenhouse
Rose et al	2009	Brassica napus	1.41518	0.00654195	P	Herbaceous	Forb	Greenhouse
Visser et al	2008	Nicotiana tabacum	-0.089895	0.00540509	N	Herbaceous	Forb	Greenhouse
Visser et al	2008	Nicotiana tabacum	-0.122339	0.0158623	N	Herbaceous	Forb	Greenhouse
Visser et al	2008	Nicotiana tabacum	0.0169496	0.0204564	P	Herbaceous	Forb	Greenhouse
Visser et al	2008	Nicotiana tabacum	0.17185	0.0297838	P	Herbaceous	Forb	Greenhouse
Wang et al	2007	Brassica napus	0.0352456	0.0141141	NP	Herbaceous	Forb	Greenhouse
Wang et al	2007	Brassica napus	-0.0172447	0.00951387	NP	Herbaceous	Forb	Greenhouse
Wijesinghe et al	2001	Campanula rotundifolia	-0.0952605	0.0377263	NP	Herbaceous	Forb	Greenhouse
Wijesinghe et al	2001	Campanula rotundifolia	0.0494273	0.0436124	NP	Herbaceous	Forb	Greenhouse
Wijesinghe et al	2001	Papaver rhoeas	-0.313227	0.0411182	NP	Herbaceous	Forb	Greenhouse
Wijesinghe et al	2001	Papaver rhoeas	-0.620633	0.0518804	NP	Herbaceous	Forb	Greenhouse
Wijesinghe et al	2001	Plantago lanceolata	-0.109813	0.0186301	NP	Herbaceous	Forb	Greenhouse
Wijesinghe et al	2001	Plantago lanceolata	-0.0408195	0.0121107	NP	Herbaceous	Forb	Greenhouse
Wijesinghe et al	2001	Sonchus oleraceus	0.0592197	0.0371366	NP	Herbaceous	Forb	Greenhouse
Wijesinghe et al	2001	Sonchus oleraceus	-0.0246584	0.0654064	NP	Herbaceous	Forb	Greenhouse
Zhou et al	2012	Alternanthera philoxeroides	0.414431	0.0304367	NP	Herbaceous	Forb	Greenhouse
Zhou et al	2012	Alternanthera philoxeroides	0.249655	0.027809	NP	Herbaceous	Forb	Greenhouse
Cui and Caldwell	1996a	Agropyron desertorum	-0.128197	0.0152945	NP	Herbaceous	Grass	Greenhouse
Cui and Caldwell	1996a	Agropyron desertorum	0.0844958	0.028548	NP	Herbaceous	Grass	Greenhouse
Cui and Caldwell	1996b	Agropyron desertorum	-0.16931	0.0165767	NP	Herbaceous	Grass	Greenhouse
Cui and Caldwell	1996b	Agropyron desertorum	0.0619562	0.012276	NP	Herbaceous	Grass	Greenhouse
Day et al	2003b	Briza media	0.173844	0.0535104	NP	Herbaceous	Grass	Greenhouse
Day et al	2003b	Briza media	-0.176132	0.0208886	NP	Herbaceous	Grass	Greenhouse
Day et al	2003b	Briza media	0	0.0516257	NP	Herbaceous	Grass	Greenhouse
Day et al	2003b	Festuca ovina	0.287682	0.128703	NP	Herbaceous	Grass	Greenhouse
Day et al	2003b	Festuca ovina	0.394653	0.021149	NP	Herbaceous	Grass	Greenhouse
Day et al	2003b	Festuca ovina	-0.388484	0.0655904	NP	Herbaceous	Grass	Greenhouse
Fransen et al	1999	Anthoxanthum odoratum	0.960462	0.0332109	NP	Herbaceous	Grass	Greenhouse
Fransen et al	1999	Anthoxanthum odoratum	0.149532	0.0449366	NP	Herbaceous	Grass	Greenhouse
Fransen et al	1999	Festuca rubra	0.788457	0.054248	N	Herbaceous	Grass	Greenhouse
Fransen et al	1999	Festuca rubra	0.427444	0.069675	N	Herbaceous	Grass	Greenhouse
Fransen et al	1999	Holcus lanatus	0.847298	0.024194	N	Herbaceous	Grass	Greenhouse
Fransen et al	1999	Holcus lanatus	0.130053	0.0285742	N	Herbaceous	Grass	Greenhouse
Fransen et al	1999	Lolium perenne	-0.14425	0.0621779	N	Herbaceous	Grass	Greenhouse
Fransen et al	1999	Lolium perenne	0.607492	0.0669751	N	Herbaceous	Grass	Greenhouse
Fransen et al	2001	Anthoxanthum odoratum	-0.177046	0.0480409	N	Herbaceous	Grass	Greenhouse
Fransen et al	2001	Anthoxanthum odoratum	0.335451	0.0480952	N	Herbaceous	Grass	Greenhouse
Fransen et al	2001	Festuca rubra	-0.241013	0.019938	N	Herbaceous	Grass	Greenhouse
Fransen et al	2001	Festuca rubra	0.165628	0.00943548	N	Herbaceous	Grass	Greenhouse
Garcia-Palacios et al	2011	Dactylis glomerata + Festuca glauca + Koeleria glauca + Lolium perenne + Lygeum spartum + Pennisetum clandestinum + Phleum pratense + Poa pratensis + Poa trivialis	0.11441	0.0110143	OF	Herbaceous	Grass	Greenhouse
Garcia-Palacios et al	2011	Dactylis glomerata + Festuca glauca + Koeleria glauca + Lolium perenne + Lygeum spartum + Pennisetum clandestinum + Phleum pratense + Poa pratensis + Poa trivialis	0.0396091	0.0259191	OF	Herbaceous	Grass	Greenhouse
He et al	2012	Triticum aestivum	0.20067	0.0188271	NP	Herbaceous	Grass	Greenhouse
He et al	2012	Triticum aestivum	0.307486	0.00984619	NP	Herbaceous	Grass	Greenhouse
He et al	2012	Triticum aestivum	-0.0870116	0.00151457	NP	Herbaceous	Grass	Greenhouse
He et al	2012	Triticum aestivum	0.135802	0.00270596	NP	Herbaceous	Grass	Greenhouse
He et al	2012	Triticum aestivum	0.212778	0.00382259	NP	Herbaceous	Grass	Greenhouse
He et al	2012	Triticum aestivum	0.146835	0.00453743	NP	Herbaceous	Grass	Greenhouse
He et al	2012	Triticum aestivum	0.776527	0.277566	NP	Herbaceous	Grass	Greenhouse
He et al	2012	Triticum aestivum	0.171584	0.00501867	NP	Herbaceous	Grass	Greenhouse
He et al	2012	Triticum aestivum	-1.16315	0.236784	NP	Herbaceous	Grass	Greenhouse
He et al	2012	Triticum aestivum	0.0304554	0.00329553	NP	Herbaceous	Grass	Greenhouse
He et al	2012	Triticum aestivum	0.186585	0.00328548	NP	Herbaceous	Grass	Greenhouse
He et al	2012	Triticum aestivum	-0.026143	0.00418247	NP	Herbaceous	Grass	Greenhouse
He et al	2012	Triticum aestivum	0.232148	0.00362763	NP	Herbaceous	Grass	Greenhouse
He et al	2012	Triticum aestivum	0.0953104	0.0202439	NP	Herbaceous	Grass	Greenhouse
He et al	2012	Triticum aestivum	0.152763	0.0110225	NP	Herbaceous	Grass	Greenhouse
Hodge et al	1998	Dactylis glomerata	-0.587015	0.0721315	OF	Herbaceous	Grass	Greenhouse
Hodge et al	1998	Festuca arundinacea	-0.0147423	0.0177983	OF	Herbaceous	Grass	Greenhouse
Hodge et al	1998	Lolium perenne	0.0172915	0.0820521	OF	Herbaceous	Grass	Greenhouse
Hodge et al	1998	Phleum pratense	-0.686274	0.127825	OF	Herbaceous	Grass	Greenhouse
Hodge et al	1998	Poa pratensis	-0.870354	0.0477873	OF	Herbaceous	Grass	Greenhouse
Jackson et al	1990	Agropyron desertorum	0	0.0930799	P	Herbaceous	Grass	Greenhouse
Lamb et al	2012	Poa pratensis	-0.609765	0.216699	NP	Herbaceous	Grass	Greenhouse
Lamb et al	2012	Poa pratensis	0	0.28203	NP	Herbaceous	Grass	Greenhouse
Lamb et al	2012	Poa pratensis	-0.864997	0.171566	NP	Herbaceous	Grass	Greenhouse
Lamb et al	2012	Poa pratensis	-0.35668	0.0982231	NP	Herbaceous	Grass	Greenhouse
Lamb et al	2012	Poa pratensis	-0.609765	0.27526	NP	Herbaceous	Grass	Greenhouse
Lamb et al	2012	Poa pratensis	0.105362	0.279572	NP	Herbaceous	Grass	Greenhouse
Lamb et al	2012	Poa pratensis	-0.864997	0.138754	NP	Herbaceous	Grass	Greenhouse
Lamb et al	2012	Poa pratensis	-0.456762	0.100593	NP	Herbaceous	Grass	Greenhouse
Li et al	2014	Triticum aestivum	0.394654	0.0279049	N	Herbaceous	Grass	Greenhouse
Li et al	2014	Triticum aestivum	0.121361	0.0292799	P	Herbaceous	Grass	Greenhouse
Li et al	2014	Triticum aestivum	0.372675	0.0339158	NP	Herbaceous	Grass	Greenhouse
Li et al	2014	Zea mays	-0.26611	0.0361769	N	Herbaceous	Grass	Greenhouse
Li et al	2014	Zea mays	-0.702537	0.050361	P	Herbaceous	Grass	Greenhouse
Li et al	2014	Zea mays	-0.047856	0.016299	NP	Herbaceous	Grass	Greenhouse
Loecke and Robertson	2009	Zea mays	0.0755085	0.0221055	OF	Herbaceous	Grass	Greenhouse
Loecke and Robertson	2009	Zea mays	-0.0332246	0.0303224	OF	Herbaceous	Grass	Greenhouse
Loecke and Robertson	2009	Zea mays	0.0321582	0.020611	OF	Herbaceous	Grass	Greenhouse
Loecke and Robertson	2009	Zea mays	0.286025	0.00654748	OF	Herbaceous	Grass	Greenhouse
Loecke and Robertson	2009	Zea mays	0.106684	0.00642253	OF	Herbaceous	Grass	Greenhouse
Loecke and Robertson	2009	Zea mays	0.265924	0.0056396	OF	Herbaceous	Grass	Greenhouse
Ma et al	2011	Triticum aestivum	0.568727	0.0233353	NP	Herbaceous	Grass	Greenhouse
Mackie-Dawson	1999	Lolium perenne	0.0323901	0.00886855	N	Herbaceous	Grass	Greenhouse
Mackie-Dawson	1999	Lolium perenne	-0.0615869	0.025295	N	Herbaceous	Grass	Greenhouse
Mackie-Dawson	1999	Lolium perenne	-0.0901844	0.0210583	N	Herbaceous	Grass	Greenhouse
Mackie-Dawson	1999	Lolium perenne	-0.336666	0.0115504	N	Herbaceous	Grass	Greenhouse
Mackie-Dawson	1999	Lolium perenne	-0.32488	0.0119675	N	Herbaceous	Grass	Greenhouse
Mackie-Dawson	1999	Lolium perenne	-0.317818	0.0107695	N	Herbaceous	Grass	Greenhouse
Maestre and Reynolds	2007	Holcus lanatus	0.162031	0.0215113	OF	Herbaceous	Grass	Greenhouse
Maestre and Reynolds	2007	Holcus lanatus	0.174303	0.0143389	OF	Herbaceous	Grass	Greenhouse
Maestre and Reynolds	2007	Lolium perenne	0.537058	0.0452349	OF	Herbaceous	Grass	Greenhouse
Maestre and Reynolds	2007	Lolium perenne	0.271041	0.0373599	OF	Herbaceous	Grass	Greenhouse
Nakamura et al	2008	Lolium perenne	0.329755	0.0456408	NP	Herbaceous	Grass	Greenhouse
Nakamura et al	2008	Lolium perenne	0.0689936	0.082095	NP	Herbaceous	Grass	Greenhouse
Nakamura et al	2008	Lolium perenne	-0.128938	0.105073	NP	Herbaceous	Grass	Greenhouse
Nakamura et al	2008	Lolium perenne	-0.689519	0.0575903	NP	Herbaceous	Grass	Greenhouse
Rose et al	2009	Triticum aestivum	0.931594	0.00667458	P	Herbaceous	Grass	Greenhouse
Schortemeyer and Feil	1996	Zea mays	-0.160773	0.0127649	N	Herbaceous	Grass	Greenhouse
Schortemeyer and Feil	1996	Zea mays	-0.0925516	0.0160406	N	Herbaceous	Grass	Greenhouse
Schortemeyer and Feil	1996	Zea mays	-0.10158	0.0149139	N	Herbaceous	Grass	Greenhouse
Si et al	2021	Sasa argenteosriata	0.939035	0.132904	OF	Herbaceous	Grass	Greenhouse
Si et al	2021	Sasaella glabra	0.485504	0.0289385	OF	Herbaceous	Grass	Greenhouse
Wijesinghe et al	2001	Arrhenatherum elatius	-0.0736123	0.0118396	NP	Herbaceous	Grass	Greenhouse
Wijesinghe et al	2001	Arrhenatherum elatius	0.0128208	0.0119255	NP	Herbaceous	Grass	Greenhouse
Wijesinghe et al	2001	Festuca ovina	-0.00741233	0.018808	NP	Herbaceous	Grass	Greenhouse
Wijesinghe et al	2001	Festuca ovina	-0.0937383	0.0185347	NP	Herbaceous	Grass	Greenhouse
Bliss et al	2002	Chamaecrista nictitans	0.387284	0.0152985	NP	Herbaceous	Legume	Field
Garcia-Palacios et al	2011	Anthyllis vulneraria + Dorycnium pentaphyllum + Lotus corniculatus + Medicago lupulina + Medicago sativa + Melilotus officinalis + Onobrychis viciifolia + Trifolium pratense + Trifolium repens	0.195492	0.0974375	OF	Herbaceous	Legume	Greenhouse
Garcia-Palacios et al	2011	Anthyllis vulneraria + Dorycnium pentaphyllum + Lotus corniculatus + Medicago lupulina + Medicago sativa + Melilotus officinalis + Onobrychis viciifolia + Trifolium pratense + Trifolium repens	0.0847965	0.0242326	OF	Herbaceous	Legume	Greenhouse
Li et al	2014	Cicer arietinum	0	0.0034626	N	Herbaceous	Legume	Greenhouse
Li et al	2014	Cicer arietinum	0	0.0034626	P	Herbaceous	Legume	Greenhouse
Li et al	2014	Cicer arietinum	0.169076	0.00513697	NP	Herbaceous	Legume	Greenhouse
Li et al	2014	Vicia faba	0.0909718	0.0166317	N	Herbaceous	Legume	Greenhouse
Li et al	2014	Vicia faba	-0.0322609	0.0157889	p	Herbaceous	Legume	Greenhouse
Li et al	2014	Vicia faba	0.0157484	0.0386113	NP	Herbaceous	Legume	Greenhouse
Ma et al	2011	Lupinus albus	0.588373	0.0183601	P	Herbaceous	Legume	Greenhouse
Rose et al	2009	Lupinus angustifolius	1.05779	0.00665545	P	Herbaceous	Legume	Greenhouse
Bliss et al	2002	Liquidambar styraciflua	0.927339	0.0443507	NP	Woody		Field
Maestre and Reynolds	2006	Prosopis glandulosa	0.128549	0.0167971	NP	Woody		Greenhouse
Maestre and Reynolds	2006	Prosopis glandulosa	-0.125861	0.0181939	NP	Woody		Greenhouse
Maestre and Reynolds	2006	Prosopis glandulosa	-0.239361	0.0516393	NP	Woody		Greenhouse
Maestre and Reynolds	2006	Prosopis glandulosa	0.0507238	0.0375623	NP	Woody		Greenhouse
Maestre and Reynolds	2006	Prosopis glandulosa	-0.314208	0.0320724	NP	Woody		Greenhouse
Maestre and Reynolds	2006	Prosopis glandulosa	-0.318337	0.0460999	N	Woody		Greenhouse
Maestre and Reynolds	2006	Prosopis glandulosa	-0.498879	0.0665866	N	Woody		Greenhouse
Maestre and Reynolds	2006	Prosopis glandulosa	-0.327953	0.0461174	P	Woody		Greenhouse
Maestre and Reynolds	2006	Prosopis glandulosa	-0.407111	0.0879795	P	Woody		Greenhouse
Mou et al	1997	Liquidambar styraciflua	-0.0251721	0.0455877	NP	Woody		Greenhouse
Mou et al	1997	Liquidambar styraciflua	-0.429884	0.0231487	NP	Woody		Greenhouse
Neatrour et al	2007	Fraxinus pennsylvanica	0.405467	0.0153318	NP	Woody		Greenhouse
Neatrour et al	2007	Fraxinus pennsylvanica	0.0118343	0.00845626	NP	Woody		Greenhouse
Neatrour et al	2007	Fraxinus pennsylvanica	-0.202024	0.013265	NP	Woody		Greenhouse
Neatrour et al	2007	Fraxinus pennsylvanica	0.363966	0.00787537	NP	Woody		Greenhouse
Neatrour et al	2007	Liquidambar styraciflua	0.223146	0.0254173	NP	Woody		Greenhouse
Neatrour et al	2007	Liquidambar styraciflua	0.0363709	0.128662	NP	Woody		Greenhouse
Neatrour et al	2007	Liquidambar styraciflua	0.0206212	0.0256356	NP	Woody		Greenhouse
Neatrour et al	2007	Liquidambar styraciflua	-0.233613	0.0354921	NP	Woody		Greenhouse
Neatrour et al	2007	Nyssa aquatica	0.150824	0.0335965	NP	Woody		Greenhouse
Neatrour et al	2007	Nyssa aquatica	0.156569	0.0177572	NP	Woody		Greenhouse
Neatrour et al	2007	Nyssa aquatica	-0.27625	0.0395524	NP	Woody		Greenhouse
Neatrour et al	2007	Nyssa aquatica	0.017097	0.0247053	NP	Woody		Greenhouse
van Vuuren et al	2003	Acer rubrum	0.0388833	0.0198031	OF	Woody		Greenhouse
van Vuuren et al	2003	Betula papyrifera	0.0870812	0.00244323	OF	Woody		Greenhouse

## Sheet: Dataset 1_Root-shoot ratio
Study	Year	Species	ln(RR)	VEZ	Nutrient types	Plant functional groups	Herbaceous species types	Experimental type
Day et al	2003a	Cardamine hirsuta	0.396769	0.0216167	NP	Herbaceous	Forb	Greenhouse
Day et al	2003a	Cardamine hirsuta	0.300583	0.0054005	NP	Herbaceous	Forb	Greenhouse
Day et al	2003a	Cardamine hirsuta	0.352118	0.00676512	NP	Herbaceous	Forb	Greenhouse
Maestre and Reynolds	2007	Plantago lanceolata	0.141606	0.0211011	OF	Herbaceous	Forb	Greenhouse
Maestre and Reynolds	2007	Plantago lanceolata	0.0767538	0.0090776	OF	Herbaceous	Forb	Greenhouse
Mou et al	2013	Callistephus chinensis	-0.0784726	0.00377776	NP	Herbaceous	Forb	Greenhouse
Mou et al	2013	Solidago altissima	-0.170957	0.00064329	NP	Herbaceous	Forb	Greenhouse
Mou et al	2013	Solidago canadensis	0	0.00266299	NP	Herbaceous	Forb	Greenhouse
Maestre et al	2007	Plantago lanceolata	0.143788	0.0217618	OF	Herbaceous	Forb	Greenhouse
Maestre et al	2007	Plantago lanceolata	-0.203228	0.0102409	OF	Herbaceous	Forb	Greenhouse
Maestre et al	2007	Plantago lanceolata	0.0833816	0.00916144	OF	Herbaceous	Forb	Greenhouse
Maestre et al	2007	Plantago lanceolata	-0.145182	0.0038984	OF	Herbaceous	Forb	Greenhouse
Cui and Caldwell	1996a	Agropyron desertorum	0.0121799	0.0168093	NP	Herbaceous	Grass	Greenhouse
Cui and Caldwell	1996a	Agropyron desertorum	0.225747	0.0133033	NP	Herbaceous	Grass	Greenhouse
Cui and Caldwell	1996b	Agropyron desertorum	-0.185052	0.00547518	NP	Herbaceous	Grass	Greenhouse
Cui and Caldwell	1996b	Agropyron desertorum	-0.0727468	0.0126092	NP	Herbaceous	Grass	Greenhouse
Lamb et al	2012	Poa pratensis	-0.0870139	0.040866	NP	Herbaceous	Grass	Greenhouse
Lamb et al	2012	Poa pratensis	0.43722	0.0273518	NP	Herbaceous	Grass	Greenhouse
Lamb et al	2012	Poa pratensis	-0.215107	0.012939	NP	Herbaceous	Grass	Greenhouse
Lamb et al	2012	Poa pratensis	-0.0540687	0.0333261	NP	Herbaceous	Grass	Greenhouse
Lamb et al	2012	Poa pratensis	-0.0870139	0.0188274	NP	Herbaceous	Grass	Greenhouse
Lamb et al	2012	Poa pratensis	0.935464	0.201035	NP	Herbaceous	Grass	Greenhouse
Lamb et al	2012	Poa pratensis	0.149536	0.0202224	NP	Herbaceous	Grass	Greenhouse
Lamb et al	2012	Poa pratensis	0.233615	0.0233386	NP	Herbaceous	Grass	Greenhouse
Li et al	2014	Triticum aestivum	0.195913	0.0218238	N	Herbaceous	Grass	Greenhouse
Li et al	2014	Triticum aestivum	0.392786	0.0199142	P	Herbaceous	Grass	Greenhouse
Li et al	2014	Triticum aestivum	0.41522	0.0197529	NP	Herbaceous	Grass	Greenhouse
Li et al	2014	Zea mays	-0.639229	0.0572791	N	Herbaceous	Grass	Greenhouse
Li et al	2014	Zea mays	-0.27084	0.0273602	P	Herbaceous	Grass	Greenhouse
Li et al	2014	Zea mays	-0.0923355	0.0237106	NP	Herbaceous	Grass	Greenhouse
Maestre and Reynolds	2007	Holcus lanatus	-0.064434	0.00903061	OF	Herbaceous	Grass	Greenhouse
Maestre and Reynolds	2007	Holcus lanatus	0.0201866	0.0192254	OF	Herbaceous	Grass	Greenhouse
Maestre and Reynolds	2007	Lolium perenne	-0.12386	0.0464453	OF	Herbaceous	Grass	Greenhouse
Maestre and Reynolds	2007	Lolium perenne	0.0647104	0.00522529	OF	Herbaceous	Grass	Greenhouse
Maestre et al	2007	Lolium perenne	-0.119189	0.0437751	OF	Herbaceous	Grass	Greenhouse
Maestre et al	2007	Lolium perenne	-0.0411581	0.0122236	OF	Herbaceous	Grass	Greenhouse
Maestre et al	2007	Lolium perenne	0.0655973	0.0045621	OF	Herbaceous	Grass	Greenhouse
Maestre et al	2007	Lolium perenne	-0.0153849	0.0201037	OF	Herbaceous	Grass	Greenhouse
Maestre et al	2007	Holcus lanatus	-0.0635134	0.00907628	OF	Herbaceous	Grass	Greenhouse
Maestre et al	2007	Holcus lanatus	-0.0287101	0.0153877	OF	Herbaceous	Grass	Greenhouse
Maestre et al	2007	Holcus lanatus	0.0188685	0.0161451	OF	Herbaceous	Grass	Greenhouse
Maestre et al	2007	Holcus lanatus	-0.0344862	0.00556585	OF	Herbaceous	Grass	Greenhouse
Li et al	2014	Cicer arietinum	0.233884	0.00279147	N	Herbaceous	Legume	Greenhouse
Li et al	2014	Cicer arietinum	0.0704683	0.0024749	P	Herbaceous	Legume	Greenhouse
Li et al	2014	Cicer arietinum	0.295491	0.00329428	NP	Herbaceous	Legume	Greenhouse
Li et al	2014	Vicia faba	-0.00613117	0.00968533	N	Herbaceous	Legume	Greenhouse
Li et al	2014	Vicia faba	0.0438556	0.00741563	P	Herbaceous	Legume	Greenhouse
Li et al	2014	Vicia faba	0.00725121	0.0263905	NP	Herbaceous	Legume	Greenhouse
Mou et al	2013	Ailanthus altissima	-0.103541	0.00144906	NP	Woody		Greenhouse
Mou et al	2013	Liquidambar formosana	0.119188	0.00164408	NP	Woody		Greenhouse
Mou et al	2013	Liquidambar styraciflua	-0.230019	0.000296746	NP	Woody		Greenhouse
Mou et al	1997	Liquidambar styraciflua	-0.117783	0.00583491	NP	Woody		Greenhouse
Mou et al	1997	Liquidambar styraciflua	0.0533879	0.00685517	NP	Woody		Greenhouse
Zhang et al	2010	Liriodendron chinese	0.439951	0.602493	NP	Woody		Greenhouse
Zhang et al	2010	Schima superba	-0.470004	0.43321	NP	Woody		Greenhouse
			#DIV/0!	#DIV/0!
			#DIV/0!	#DIV/0!
			#DIV/0!	#DIV/0!
			#DIV/0!	#DIV/0!
			#DIV/0!	#DIV/0!
			#DIV/0!	#DIV/0!
			#DIV/0!	#DIV/0!
			#DIV/0!	#DIV/0!
			#DIV/0!	#DIV/0!
			#DIV/0!	#DIV/0!
			#DIV/0!	#DIV/0!
			#DIV/0!	#DIV/0!
			#DIV/0!	#DIV/0!
			#DIV/0!	#DIV/0!
			#DIV/0!	#DIV/0!
			#DIV/0!	#DIV/0!
			#DIV/0!	#DIV/0!
			#DIV/0!	#DIV/0!
			#DIV/0!	#DIV/0!
			#DIV/0!	#DIV/0!
			#DIV/0!	#DIV/0!
			#DIV/0!	#DIV/0!
			#DIV/0!	#DIV/0!
			#DIV/0!	#DIV/0!
			#DIV/0!	#DIV/0!
			#DIV/0!	#DIV/0!
			#DIV/0!	#DIV/0!
			#DIV/0!	#DIV/0!
			#DIV/0!	#DIV/0!
			#DIV/0!	#DIV/0!
			#DIV/0!	#DIV/0!
			#DIV/0!	#DIV/0!
			#DIV/0!	#DIV/0!
			#DIV/0!	#DIV/0!
			#DIV/0!	#DIV/0!
			#DIV/0!	#DIV/0!
			#DIV/0!	#DIV/0!
			#DIV/0!	#DIV/0!
			#DIV/0!	#DIV/0!
			#DIV/0!	#DIV/0!
			#DIV/0!	#DIV/0!
			#DIV/0!	#DIV/0!
			#DIV/0!	#DIV/0!
			#DIV/0!	#DIV/0!
			#DIV/0!	#DIV/0!
			#DIV/0!	#DIV/0!
			#DIV/0!	#DIV/0!
			#DIV/0!	#DIV/0!
			#DIV/0!	#DIV/0!
			#DIV/0!	#DIV/0!
			#DIV/0!	#DIV/0!
			#DIV/0!	#DIV/0!
			#DIV/0!	#DIV/0!
			#DIV/0!	#DIV/0!
			#DIV/0!	#DIV/0!
			#DIV/0!	#DIV/0!
			#DIV/0!	#DIV/0!
			#DIV/0!	#DIV/0!
			#DIV/0!	#DIV/0!
			#DIV/0!	#DIV/0!
			#DIV/0!	#DIV/0!
			#DIV/0!	#DIV/0!
			#DIV/0!	#DIV/0!
			#DIV/0!	#DIV/0!
			#DIV/0!	#DIV/0!
			#DIV/0!	#DIV/0!
			#DIV/0!	#DIV/0!
			#DIV/0!	#DIV/0!
			#DIV/0!	#DIV/0!
			#DIV/0!	#DIV/0!
			#DIV/0!	#DIV/0!
			#DIV/0!	#DIV/0!
			#DIV/0!	#DIV/0!
			#DIV/0!	#DIV/0!
			#DIV/0!	#DIV/0!
			#DIV/0!	#DIV/0!
			#DIV/0!	#DIV/0!
			#DIV/0!	#DIV/0!
			#DIV/0!	#DIV/0!
			#DIV/0!	#DIV/0!
			#DIV/0!	#DIV/0!
			#DIV/0!	#DIV/0!
			#DIV/0!	#DIV/0!
			#DIV/0!	#DIV/0!
			#DIV/0!	#DIV/0!
			#DIV/0!	#DIV/0!
			#DIV/0!	#DIV/0!
			#DIV/0!	#DIV/0!
			#DIV/0!	#DIV/0!
			#DIV/0!	#DIV/0!
			#DIV/0!	#DIV/0!
			#DIV/0!	#DIV/0!
			#DIV/0!	#DIV/0!
			#DIV/0!	#DIV/0!
			#DIV/0!	#DIV/0!
			#DIV/0!	#DIV/0!
			#DIV/0!	#DIV/0!
			#DIV/0!	#DIV/0!
			#DIV/0!	#DIV/0!
			#DIV/0!	#DIV/0!
			#DIV/0!	#DIV/0!
			#DIV/0!	#DIV/0!
			#DIV/0!	#DIV/0!
			#DIV/0!	#DIV/0!
			#DIV/0!	#DIV/0!
			#DIV/0!	#DIV/0!
			#DIV/0!	#DIV/0!
			#DIV/0!	#DIV/0!
			#DIV/0!	#DIV/0!
			#DIV/0!	#DIV/0!
			#DIV/0!	#DIV/0!
			#DIV/0!	#DIV/0!
			#DIV/0!	#DIV/0!
			#DIV/0!	#DIV/0!
			#DIV/0!	#DIV/0!
			#DIV/0!	#DIV/0!
			#DIV/0!	#DIV/0!
			#DIV/0!	#DIV/0!
			#DIV/0!	#DIV/0!
			#DIV/0!	#DIV/0!
			#DIV/0!	#DIV/0!
			#DIV/0!	#DIV/0!
			#DIV/0!	#DIV/0!
			#DIV/0!	#DIV/0!

## Sheet: Dataset 1_root foraging precis.
Study	year	Species	RFP	RFP_VEZ	Nutrient types	Plant functional groups	Herbaceous species types	Experimental type
Bliss et al	2002	Erechtites hieracifolia	-0.003	0.0003	NP	Herbaceous	Forb	Field
Bliss et al	2002	Hypericum gentianoides	-0.017	0.0017	NP	Herbaceous	Forb	Field
Bliss et al	2002	Solidago altissima	0.419	0.0419	NP	Herbaceous	Forb	Field
Cui and Caldwell	1998	Artemisia tridentata	0.333332	0.0102882	N	Herbaceous	Forb	Greenhouse
Cui and Caldwell	1998	Artemisia tridentata	0.333332	0.0102882	NP	Herbaceous	Forb	Greenhouse
Cui and Caldwell	1998	Artemisia tridentata	0.307694	0.0105371	P	Herbaceous	Forb	Greenhouse
Einsmann et al	1999	Desmodium strictum	-0.0127879	0.183594	NP	Herbaceous	Forb	Greenhouse
Einsmann et al	1999	Elephantopus tomentosus	0.184528	0.164748	NP	Herbaceous	Forb	Greenhouse
Einsmann et al	1999	Erigeron canadensis	0.240988	0.174171	NP	Herbaceous	Forb	Greenhouse
Einsmann et al	1999	Hypericum gentianoides	0.352188	0.207123	NP	Herbaceous	Forb	Greenhouse
Einsmann et al	1999	Solidago nemoralis	0.207496	0.169457	NP	Herbaceous	Forb	Greenhouse
James et al	2009	Balsamorhiza sagittata	-0.0285714	0.0148587	N	Herbaceous	Forb	Greenhouse
James et al	2009	Centaurea diffusa	0.011976	0.00329178	N	Herbaceous	Forb	Greenhouse
James et al	2009	Chondrilla juncea	-0.327586	0.0101337	N	Herbaceous	Forb	Greenhouse
James et al	2009	Crepis intermedia	0.0980392	0.0296142	N	Herbaceous	Forb	Greenhouse
James et al	2009	Linaria dalmatica	0.0409556	0.00225588	N	Herbaceous	Forb	Greenhouse
James et al	2009	Phlox longifolia	-0.166667	0.0171046	N	Herbaceous	Forb	Greenhouse
James et al	2009	Pseudoroegenaria spicata	-0.00990099	0.0096152	N	Herbaceous	Forb	Greenhouse
Jansen et al	2005	Achillea millefolium	0.00920868	0.00716705	N	Herbaceous	Forb	Greenhouse
Jansen et al	2005	Achillea ptarmica	0.000557207	0.00706651	N	Herbaceous	Forb	Greenhouse
Jansen et al	2005	Ranunculus bulbosus	0.0244408	0.00739154	N	Herbaceous	Forb	Greenhouse
Jansen et al	2005	Ranunculus repens	0.0264162	0.00456515	N	Herbaceous	Forb	Greenhouse
Jansen et al	2005	Rumex palustris	-0.072452	0.00652038	N	Herbaceous	Forb	Greenhouse
Jansen et al	2005	Rumex thyrsiflorus	-0.150542	0.00426445	N	Herbaceous	Forb	Greenhouse
Maestre and Reynolds	2007	Plantago lanceolata	0.700361	0.183899	OF	Herbaceous	Forb	Greenhouse
Maestre et al	2006	Plantago lanceolata	0.702041	0.130612	OF	Herbaceous	Forb	Greenhouse
Maestre et al	2006	Plantago lanceolata	0.702041	0.114286	OF	Herbaceous	Forb	Greenhouse
Maestre et al	2006	Plantago lanceolata	0.795918	0.016327	OF	Herbaceous	Forb	Greenhouse
Maestre et al	2006	Plantago lanceolata	0.706122	0.069388	OF	Herbaceous	Forb	Greenhouse
Maestre et al	2006	Plantago lanceolata	0.551136	0.278411	OF	Herbaceous	Forb	Greenhouse
Maestre et al	2006	Plantago lanceolata	0.732955	0.626418	OF	Herbaceous	Forb	Greenhouse
Stevens and Jones	2006	Eupatorium compositifolium	0.667546	0.180475	N	Herbaceous	Forb	Greenhouse
Stevens and Jones	2006	Solidago altissima	0.501319	0.094986	NP	Herbaceous	Forb	Greenhouse
Visser et al	2008	Nicotiana tabacum	0.420833	0.035375	N	Herbaceous	Forb	Greenhouse
Visser et al	2008	Nicotiana tabacum	0.46875	0.106125	N	Herbaceous	Forb	Greenhouse
Visser et al	2008	Nicotiana tabacum	0.136567	0.0950371	P	Herbaceous	Forb	Greenhouse
Visser et al	2008	Nicotiana tabacum	0.174627	0.126716	P	Herbaceous	Forb	Greenhouse
Wijesinghe et al	2001	Campanula rotundifolia	-0.117648	0.00649294	NP	Herbaceous	Forb	Greenhouse
Wijesinghe et al	2001	Campanula rotundifolia	-0.0363653	0.00377465	NP	Herbaceous	Forb	Greenhouse
Wijesinghe et al	2001	Campanula rotundifolia	0.00869516	0.00439549	NP	Herbaceous	Forb	Greenhouse
Wijesinghe et al	2001	Campanula rotundifolia	-0.0458727	0.00485986	NP	Herbaceous	Forb	Greenhouse
Wijesinghe et al	2001	Campanula rotundifolia	0.0256396	0.00474298	NP	Herbaceous	Forb	Greenhouse
Wijesinghe et al	2001	Campanula rotundifolia	-0.0555562	0.00633757	NP	Herbaceous	Forb	Greenhouse
Wijesinghe et al	2001	Papaver rhoeas	-0.238098	0.00543698	NP	Herbaceous	Forb	Greenhouse
Wijesinghe et al	2001	Papaver rhoeas	-0.142857	0.00463919	NP	Herbaceous	Forb	Greenhouse
Wijesinghe et al	2001	Papaver rhoeas	-0.333328	0.0149773	NP	Herbaceous	Forb	Greenhouse
Wijesinghe et al	2001	Papaver rhoeas	-0.238097	0.00543697	NP	Herbaceous	Forb	Greenhouse
Wijesinghe et al	2001	Papaver rhoeas	-0.28395	0.00596819	NP	Herbaceous	Forb	Greenhouse
Wijesinghe et al	2001	Papaver rhoeas	-0.444442	0.00524513	NP	Herbaceous	Forb	Greenhouse
Wijesinghe et al	2001	Plantago lanceolata	-0.021583	0.00155399	NP	Herbaceous	Forb	Greenhouse
Wijesinghe et al	2001	Plantago lanceolata	-0.0518499	0.00169198	NP	Herbaceous	Forb	Greenhouse
Wijesinghe et al	2001	Plantago lanceolata	-0.100769	0.00239802	NP	Herbaceous	Forb	Greenhouse
Wijesinghe et al	2001	Plantago lanceolata	-0.0216515	0.00155711	NP	Herbaceous	Forb	Greenhouse
Wijesinghe et al	2001	Plantago lanceolata	-0.0143881	0.00102112	NP	Herbaceous	Forb	Greenhouse
Wijesinghe et al	2001	Plantago lanceolata	-0.0142854	0.00152348	NP	Herbaceous	Forb	Greenhouse
Wijesinghe et al	2001	Sonchus oleraceus	-0.044343	0.00508656	NP	Herbaceous	Forb	Greenhouse
Wijesinghe et al	2001	Sonchus oleraceus	0.0310707	0.00358911	NP	Herbaceous	Forb	Greenhouse
Wijesinghe et al	2001	Sonchus oleraceus	0.0310222	0.00306961	NP	Herbaceous	Forb	Greenhouse
Wijesinghe et al	2001	Sonchus oleraceus	-0.0329179	0.00348914	NP	Herbaceous	Forb	Greenhouse
Wijesinghe et al	2001	Sonchus oleraceus	-0.0216366	0.00759881	NP	Herbaceous	Forb	Greenhouse
Wijesinghe et al	2001	Sonchus oleraceus	0.104811	0.00353231	NP	Herbaceous	Forb	Greenhouse
Wang et al	2020	Chenopodium glaucum	-0.0920705	0.00195461	OF	Herbaceous	Forb	Greenhouse
Cui and Caldwell	1998	Agropyron desertorum	0.283582	0.0136025	N	Herbaceous	Grass	Greenhouse
Cui and Caldwell	1998	Agropyron desertorum	0.221621	0.0180485	NP	Herbaceous	Grass	Greenhouse
Cui and Caldwell	1998	Agropyron desertorum	0.111111	0.00835896	P	Herbaceous	Grass	Greenhouse
Cui and Caldwell	1996a	Agropyron desertorum	0.287235	0.00150581	NP	Herbaceous	Grass	Greenhouse
Cui and Caldwell	1996a	Agropyron desertorum	0.204819	0.00295061	NP	Herbaceous	Grass	Greenhouse
Hodge et al	1998	Dactylis glomerata	-0.28536	0.0120169	OF	Herbaceous	Grass	Greenhouse
Hodge et al	1998	Festuca arundinacea	-0.00737101	0.00296514	OF	Herbaceous	Grass	Greenhouse
Hodge et al	1998	Lolium perenne	0.00864553	0.0163529	OF	Herbaceous	Grass	Greenhouse
Hodge et al	1998	Phleum pratense	-0.330275	0.0212952	OF	Herbaceous	Grass	Greenhouse
Hodge et al	1998	Poa pratensis	-0.409639	0.00796123	OF	Herbaceous	Grass	Greenhouse
James et al	2009	Achnatherum thurberianum	-0.180952	0.00851659	N	Herbaceous	Grass	Greenhouse
James et al	2009	Festuca idahoensis	-0.327766	0.00662508	N	Herbaceous	Grass	Greenhouse
Jansen et al	2005	Festuca arundinacea	-0.0925009	0.00348929	N	Herbaceous	Grass	Greenhouse
Jansen et al	2005	Festuca rubra	0.053177	0.00289346	N	Herbaceous	Grass	Greenhouse
Jing et al	2010	Zea mays	0.394683	0.0173563	NP	Herbaceous	Grass	Field
Jing et al	2010	Zea mays	0.331104	0.0277816	NP	Herbaceous	Grass	Field
Jing et al	2010	Zea mays	0.663717	0.0212942	NP	Herbaceous	Grass	Field
Jing et al	2010	Zea mays	0.213115	0.0581946	NP	Herbaceous	Grass	Field
Jing et al	2010	Zea mays	0.221053	0.0134912	P	Herbaceous	Grass	Field
Jing et al	2010	Zea mays	0.145299	0.0297498	P	Herbaceous	Grass	Field
Jing et al	2010	Zea mays	0.479452	0.0525755	P	Herbaceous	Grass	Field
Jing et al	2010	Zea mays	0.157895	0.0546516	P	Herbaceous	Grass	Field
Li et al	2014	Triticum aestivum	0.0828728	0.00188512	N	Herbaceous	Grass	Greenhouse
Li et al	2014	Triticum aestivum	0.370019	0.00608732	NP	Herbaceous	Grass	Greenhouse
Li et al	2014	Triticum aestivum	0.43824	0.00159739	P	Herbaceous	Grass	Greenhouse
Li et al	2014	Zea mays	-0.110411	0.00684609	N	Herbaceous	Grass	Greenhouse
Li et al	2014	Zea mays	0.301587	0.00265471	NP	Herbaceous	Grass	Greenhouse
Li et al	2014	Zea mays	0.0563011	0.00926239	P	Herbaceous	Grass	Greenhouse
Ma et al	2011	Triticum aestivum	0.272569	0.00615233	P	Herbaceous	Grass	Greenhouse
Maestre and Reynolds	2007	Holcus lanatus	0.794224	0.194115	OF	Herbaceous	Grass	Greenhouse
Maestre and Reynolds	2007	Lolium perenne	0.826715	0.122598	OF	Herbaceous	Grass	Greenhouse
Maestre et al	2006	Lolium perenne	0.8	0.106122	OF	Herbaceous	Grass	Greenhouse
Maestre et al	2006	Lolium perenne	0.881633	0.040816	OF	Herbaceous	Grass	Greenhouse
Maestre et al	2006	Lolium perenne	0.84898	0.048979	OF	Herbaceous	Grass	Greenhouse
Maestre et al	2006	Lolium perenne	0.889796	0.065306	OF	Herbaceous	Grass	Greenhouse
Maestre et al	2006	Lolium perenne	0.352273	0.6125	OF	Herbaceous	Grass	Greenhouse
Maestre et al	2006	Lolium perenne	0.420455	1.09971	OF	Herbaceous	Grass	Greenhouse
Maestre et al	2006	Poa pratensis	-0.164773	1.50341	OF	Herbaceous	Grass	Greenhouse
Maestre et al	2006	Poa pratensis	-0.329545	1.00227	OF	Herbaceous	Grass	Greenhouse
Maestre et al	2006	Poa pratensis	0.820408	0.085714	OF	Herbaceous	Grass	Greenhouse
Maestre et al	2006	Poa pratensis	0.84898	0.089796	OF	Herbaceous	Grass	Greenhouse
Maestre et al	2006	Poa pratensis	0.767347	0.155102	OF	Herbaceous	Grass	Greenhouse
Maestre et al	2006	Poa pratensis	0.853061	0.142857	OF	Herbaceous	Grass	Greenhouse
Stevens and Jones	2006	Andropogon ternarius	0.501319	0.151981	NP	Herbaceous	Grass	Greenhouse
Wijesinghe et al	2001	Arrhenatherum elatius	0.0222225	0.000928137	NP	Herbaceous	Grass	Greenhouse
Wijesinghe et al	2001	Arrhenatherum elatius	-0.0292401	0.000995669	NP	Herbaceous	Grass	Greenhouse
Wijesinghe et al	2001	Arrhenatherum elatius	0.0329674	0.00104017	NP	Herbaceous	Grass	Greenhouse
Wijesinghe et al	2001	Arrhenatherum elatius	0.00564978	0.00108726	NP	Herbaceous	Grass	Greenhouse
Wijesinghe et al	2001	Arrhenatherum elatius	0.0112361	0.00107722	NP	Herbaceous	Grass	Greenhouse
Wijesinghe et al	2001	Arrhenatherum elatius	-0.0232561	0.00132722	NP	Herbaceous	Grass	Greenhouse
Wijesinghe et al	2001	Festuca ovina	0.00645188	0.00188487	NP	Herbaceous	Grass	Greenhouse
Wijesinghe et al	2001	Festuca ovina	-0.00653471	0.0013565	NP	Herbaceous	Grass	Greenhouse
Wijesinghe et al	2001	Festuca ovina	-0.0266662	0.00154864	NP	Herbaceous	Grass	Greenhouse
Wijesinghe et al	2001	Festuca ovina	-0.0620684	0.00162012	NP	Herbaceous	Grass	Greenhouse
Wijesinghe et al	2001	Festuca ovina	-0.0476179	0.00158967	NP	Herbaceous	Grass	Greenhouse
Wijesinghe et al	2001	Festuca ovina	0.0253175	0.0014605	NP	Herbaceous	Grass	Greenhouse
Zhang et al	2016	Zea mays	0.664922	0.0766899	P	Herbaceous	Grass	Greenhouse
Hou et al	2017	Neyraudia reynaudiana	0.359005	0.0349478	P	Herbaceous	Grass	Greenhouse
Hou et al	2017	Neyraudia reynaudiana	-0.21338	0.0239349	P	Herbaceous	Grass	Greenhouse
Hou et al	2017	Neyraudia reynaudiana	-0.208607	0.0162056	P	Herbaceous	Grass	Greenhouse
Hou et al	2017	Neyraudia reynaudiana	0.0235397	0.00370872	P	Herbaceous	Grass	Greenhouse
Hou et al	2017	Neyraudia reynaudiana	0.0194119	0.0101997	P	Herbaceous	Grass	Greenhouse
Si et al	2021	Sasa argenteosriata	0.43781	0.132904	OF	Herbaceous	Grass	Greenhouse
Si et al	2021	Sasaella glabra	0.238093	0.0289385	OF	Herbaceous	Grass	Greenhouse
Wang et al	2020	Chloris virgate	0.0708958	0.00174574	OF	Herbaceous	Grass	Greenhouse
Bliss et al	2002	Chamaecrista nictitans	0.22	0.022	NP	Herbaceous	Legume	Field
Einsmann et al	1999	Chamaecrista nictitans	0.429889	0.174164	NP	Herbaceous	Legume	Greenhouse
Li et al	2014	Cicer arietinum	-0.0169472	0.000297008	N	Herbaceous	Legume	Greenhouse
Li et al	2014	Cicer arietinum	0.162305	0.0057057	NP	Herbaceous	Legume	Greenhouse
Li et al	2014	Cicer arietinum	0.163763	0.00136032	P	Herbaceous	Legume	Greenhouse
Li et al	2014	Vicia faba	0.141683	0.00923944	N	Herbaceous	Legume	Greenhouse
Li et al	2014	Vicia faba	0.200765	0.0106346	NP	Herbaceous	Legume	Greenhouse
Li et al	2014	Vicia faba	0.158955	0.00637099	P	Herbaceous	Legume	Greenhouse
Ma et al	2011	Lupinus albus	0.150006	0.00408258	P	Herbaceous	Legume	Greenhouse
Blair and Perfecto	2004	Albizia guachapele	-0.259259	0.0102253	P	Woody		Greenhouse
Blair and Perfecto	2004	Cedrela odorata	0.12	0.0077482	P	Woody		Greenhouse
Blair and Perfecto	2004	Ceiba pentandra	0.0232558	0.00615911	P	Woody		Greenhouse
Blair and Perfecto	2004	Cordia alliodora	-0.0243902	0.00850482	P	Woody		Greenhouse
Blair and Perfecto	2004	Dalbergia retusa	-0.012987	0.00531579	P	Woody		Greenhouse
Blair and Perfecto	2004	Gliricidia sepium	0.127273	0.00306326	P	Woody		Greenhouse
Bliss et al	2002	Liquidambar styraciflua	0.322	0.0322	NP	Woody		Field
Einsmann et al	1999	Diospyros virginiana	0.119454	0.188294	NP	Woody		Greenhouse
Einsmann et al	1999	Euonymus americanus	0.00596306	0.240059	NP	Woody		Greenhouse
Einsmann et al	1999	Liquidambar styraciflua	0.446539	0.183593	NP	Woody		Greenhouse
Maestre and Reynolds	2006	Prosopis glandulosa	0.263158	0.444151	N	Woody		Greenhouse
Maestre and Reynolds	2006	Prosopis glandulosa	-0.0350877	0.902632	N	Woody		Greenhouse
Maestre and Reynolds	2006	Prosopis glandulosa	-0.0406977	0.299129	N	Woody		Greenhouse
Maestre and Reynolds	2006	Prosopis glandulosa	0.127907	0.826162	N	Woody		Greenhouse
Maestre and Reynolds	2006	Prosopis glandulosa	-0.0994832	1.426	N	Woody		Greenhouse
Maestre and Reynolds	2006	Prosopis glandulosa	0.0584795	0.429824	NP	Woody		Greenhouse
Maestre and Reynolds	2006	Prosopis glandulosa	0.157895	0.845321	NP	Woody		Greenhouse
Maestre and Reynolds	2006	Prosopis glandulosa	0.415205	0.487134	NP	Woody		Greenhouse
Maestre and Reynolds	2006	Prosopis glandulosa	0.48538	0.329532	NP	Woody		Greenhouse
Maestre and Reynolds	2006	Prosopis glandulosa	0.0935673	0.40117	NP	Woody		Greenhouse
Maestre and Reynolds	2006	Prosopis glandulosa	0.145349	0.527034	NP	Woody		Greenhouse
Maestre and Reynolds	2006	Prosopis glandulosa	0.104651	0.655233	NP	Woody		Greenhouse
Maestre and Reynolds	2006	Prosopis glandulosa	0.0348837	0.398836	NP	Woody		Greenhouse
Maestre and Reynolds	2006	Prosopis glandulosa	0.203488	1.02558	NP	Woody		Greenhouse
Maestre and Reynolds	2006	Prosopis glandulosa	0.280702	0.616082	P	Woody		Greenhouse
Maestre and Reynolds	2006	Prosopis glandulosa	-0.192982	0.873979	P	Woody		Greenhouse
Maestre and Reynolds	2006	Prosopis glandulosa	0.0930233	1.24241	P	Woody		Greenhouse
Maestre and Reynolds	2006	Prosopis glandulosa	0.418605	0.968603	P	Woody		Greenhouse
Mou et al	1997	Liquidambar styraciflua	0.478732	0.194068	NP	Woody		Greenhouse
Mou et al	1997	Liquidambar styraciflua	0.480854	0.172506	NP	Woody		Greenhouse
Neatrour et al	2007	Fraxinus pennsylvanica	0.306306	0.529909	NP	Woody		Greenhouse
Neatrour et al	2007	Fraxinus pennsylvanica	0.630631	0.529909	NP	Woody		Greenhouse
Neatrour et al	2007	Fraxinus pennsylvanica	0.351351	0.529913	NP	Woody		Greenhouse
Neatrour et al	2007	Fraxinus pennsylvanica	0.594595	0.498738	NP	Woody		Greenhouse
Neatrour et al	2007	Liquidambar styraciflua	-0.396396	0.498742	NP	Woody		Greenhouse
Neatrour et al	2007	Liquidambar styraciflua	0.621622	0.467567	NP	Woody		Greenhouse
Neatrour et al	2007	Liquidambar styraciflua	0.36036	0.467567	NP	Woody		Greenhouse
Neatrour et al	2007	Liquidambar styraciflua	0.891892	0.467577	NP	Woody		Greenhouse
Neatrour et al	2007	Nyssa aquatica	0.369369	0.4973	NP	Woody		Greenhouse
Neatrour et al	2007	Nyssa aquatica	0.45045	0.4973	NP	Woody		Greenhouse
Neatrour et al	2007	Nyssa aquatica	0.216216	0.59054	NP	Woody		Greenhouse
Neatrour et al	2007	Nyssa aquatica	0.315315	0.497297	NP	Woody		Greenhouse
Zhang et al	2010	Liriodendron chinese	-0.0107527	0.0310231	NP	Woody		Greenhouse
Zhang et al	2010	Schima superba	0.331933	0.0312978	NP	Woody		Greenhouse

## Sheet: Dataset 2_RFP of woody
Study	Year	Species	Root diameter (mm)	RFP	RFP_VEZ	Nutrient types	Mycorrhizal types
Liu et al	2019	Acer fabri	0.198125	0.163558	0.0223403	N	AM
Liu et al	2019	Schima superba	0.1952	0.430005	0.0256872	N	AM
Liu et al	2019	Choerospondias axillaris	0.25775	0.199313	0.0138323	N	AM
Liu et al	2019	Liquidambar formosana	0.258387	0.0313062	0.00958372	N	AM
Liu et al	2019	Elaeocarpus glabripetalus	0.269092	0.14974	0.0257056	N	AM
Liu et al	2019	Alniphyllum fortunei	0.294262	0.133652	0.0145456	N	AM
Liu et al	2019	Cinnamomum porrectum	0.316063	0.360603	0.019469	N	AM
Liu et al	2019	Cinnamomum austrosinense	0.329187	0.0630276	0.0732818	N	AM
Liu et al	2019	Machilus oculodracontis	0.508312	0.0123525	0.0164849	N	AM
Liu et al	2019	Manglietia yuyuanensis	0.531737	-0.103369	0.0276538	N	AM
Liu et al	2019	Neolitsea phanerophlebia	0.59765	-0.061466	0.00727665	N	AM
Liu et al	2019	Cunninghamia lanceolata	0.68795	0.250613	0.0373391	N	AM
Liu et al	2019	Taxus chinensis	0.733781	0.403526	0.0579346	N	AM
Eissenstat et al	2015	Acer rubrum	0.333021	0.140366	0.00824807	NP	AM
Eissenstat et al	2015	Fraxinus americana	0.44918	0.164063	0.0112303	NP	AM
Eissenstat et al	2015	Liriodendron tulipifera	0.679625	0.255208	0.18512	NP	AM
Eissenstat et al	2015	Magnolia acuminata	0.926932	0.0868486	0.016162	NP	AM
Eissenstat et al	2015	Ulmus americana	0.244965	0.22846	0.00330409	NP	AM
Cheng et al	2016	Acer negundo	0.32	-0.0695306	0.041645	NP	AM
Cheng et al	2016	Acer negundo	0.32	0.0175236	0.0562237	NP	AM
Cheng et al	2016	Liriodendron tulipifera	0.86	0.0125697	0.031049	NP	AM
Cheng et al	2016	Liriodendron tulipifera	0.86	-0.201915	0.0285562	NP	AM
Liu et al	2019	Acer fabri	0.207175	0.533054	0.0178026	NP	AM
Liu et al	2019	Schima superba	0.203775	0.147684	0.0158106	NP	AM
Liu et al	2019	Choerospondias axillaris	0.260613	0.0801317	0.0181019	NP	AM
Liu et al	2019	Liquidambar formosana	0.270798	0.146954	0.00475648	NP	AM
Liu et al	2019	Elaeocarpus glabripetalus	0.286038	-0.00224541	0.00974587	NP	AM
Liu et al	2019	Alniphyllum fortunei	0.3107	0.197717	0.0125195	NP	AM
Liu et al	2019	Cinnamomum porrectum	0.291133	0.64805	0.0124087	NP	AM
Liu et al	2019	Cinnamomum austrosinense	0.3604	0.401539	0.0728195	NP	AM
Liu et al	2019	Machilus oculodracontis	0.564133	0.0551215	0.0359817	NP	AM
Liu et al	2019	Manglietia yuyuanensis	0.586394	-0.0840614	0.0145013	NP	AM
Liu et al	2019	Neolitsea phanerophlebia	0.593812	-0.239526	0.00837074	NP	AM
Liu et al	2019	Cunninghamia lanceolata	0.6774	0.253716	0.019548	NP	AM
Liu et al	2019	Taxus chinensis	0.7539	0.286171	0.0500826	NP	AM
Caplan et al	2017	Berberis thunbergii	0.285417	0.30909	0.0105729	OF	AM
Caplan et al	2017	Lonicera maackii	0.254812	0.307889	0.0133908	OF	AM
Caplan et al	2017	Rubus phoenicolasius	0.221003	0.173186	0.0273877	OF	AM
Caplan et al	2017	Rubus allegheniensis	0.194844	0.373493	0.0202447	OF	AM
Caplan et al	2017	Vibernum dentatum	0.535313	0.385768	0.00790732	OF	AM
Caplan et al	2017	Lindera benzoin	0.702595	0.170212	0.00404115	OF	AM
Chen et al	2016	Acer saccharum	0.29	0.501618	0.0179456	OF	AM
Chen et al	2016	Acer negundo	0.29	0.468013	0.0217629	OF	AM
Chen et al	2016	Prunus serotina	0.35	0.436619	0.0454233	OF	AM
Chen et al	2016	Juglans nigra	0.36	0.291139	0.0122103	OF	AM
Chen et al	2016	Sassafras albidum	0.61	0.0869563	0.056759	OF	AM
Chen et al	2016	Liriodendron tulipifera	0.83	0.204821	0.0157964	OF	AM
Cheng et al	2016	Acer negundo	0.32	0.396312	0.0344013	OF	AM
Cheng et al	2016	Liriodendron tulipifera	0.86	0.357964	0.0423998	OF	AM
Liu et al	2019	Acer fabri	0.182212	0.0999523	0.0299344	P	AM
Liu et al	2019	Schima superba	0.194375	0.163789	0.0113453	P	AM
Liu et al	2019	Choerospondias axillaris	0.284787	-0.306272	0.0313058	P	AM
Liu et al	2019	Liquidambar formosana	0.244487	0.123257	0.0100271	P	AM
Liu et al	2019	Elaeocarpus glabripetalus	0.29875	-0.195079	0.0196604	P	AM
Liu et al	2019	Alniphyllum fortunei	0.298175	0.0293936	0.0159339	P	AM
Liu et al	2019	Cinnamomum porrectum	0.336087	-0.114746	0.0153523	P	AM
Liu et al	2019	Cinnamomum austrosinense	0.3365	0.0473396	0.093404	P	AM
Liu et al	2019	Machilus oculodracontis	0.542362	-0.264682	0.0656371	P	AM
Liu et al	2019	Manglietia yuyuanensis	0.527012	-0.309525	0.0184877	P	AM
Liu et al	2019	Neolitsea phanerophlebia	0.558025	-0.0911811	0.0407497	P	AM
Liu et al	2019	Cunninghamia lanceolata	0.693194	0.118452	0.0457152	P	AM
Liu et al	2019	Taxus chinensis	0.6698	0.0768501	0.0522022	P	AM
Cheng et al	2016	Quercus alba	0.191	0.109393	0.0376666	NP	ECM
Cheng et al	2016	Quercus alba	0.191	-0.0952048	0.0286742	NP	ECM
Cheng et al	2016	Pinus strobus	0.762	-0.163165	0.0389636	NP	ECM
Cheng et al	2016	Pinus strobus	0.762	0.209186	0.00766478	NP	ECM
Chen et al	2016	Betula alleghaniensis	0.24	0.314079	0.0229898	OF	ECM
Chen et al	2016	Carya glabra	0.19	0.0891087	0.00680975	OF	ECM
Chen et al	2016	Picea rubens	0.45	-0.093168	0.0501548	OF	ECM
Chen et al	2016	Pinus strobus	0.63	-0.259259	0.0468208	OF	ECM
Chen et al	2016	Pinus virginiana	0.46	-0.0793651	0.0256769	OF	ECM
Chen et al	2016	Quercus alba	0.19	0.157896	0.0497521	OF	ECM
Chen et al	2016	Quercus rubra	0.21	0.25	0.0113388	OF	ECM
Cheng et al	2016	Quercus alba	0.191	0.0751632	0.0262943	OF	ECM
Cheng et al	2016	Pinus strobus	0.762	0.0707601	0.0171538	OF	ECM

## Sheet: Dataset 2_HFP of woody
Study	Year	Species	Root diameter (mm)	HFP	HFP_VEZ	Nutrient types	Mycorrhizal types
Liu et al	2019	Acer fabri	0.198125	0.0696596	0.0153147	N	AM
Liu et al	2019	Schima superba	0.1952	-0.212429	0.0116537	N	AM
Liu et al	2019	Choerospondias axillaris	0.25775	0.0318404	0.00457751	N	AM
Liu et al	2019	Liquidambar formosana	0.258387	0.138386	0.024813	N	AM
Liu et al	2019	Elaeocarpus glabripetalus	0.269092	-0.0627224	0.0177814	N	AM
Liu et al	2019	Alniphyllum fortunei	0.294262	0.0684515	0.024772	N	AM
Liu et al	2019	Cinnamomum porrectum	0.316063	-0.0827298	0.010875	N	AM
Liu et al	2019	Cinnamomum austrosinense	0.329187	0.102375	0.00848335	N	AM
Liu et al	2019	Machilus oculodracontis	0.508312	0.164441	0.0261767	N	AM
Liu et al	2019	Manglietia yuyuanensis	0.531737	-0.0714882	0.00698812	N	AM
Liu et al	2019	Neolitsea phanerophlebia	0.59765	0.13826	0.0138551	N	AM
Liu et al	2019	Cunninghamia lanceolata	0.68795	0.244595	0.00729048	N	AM
Liu et al	2019	Taxus chinensis	0.733781	0.0782313	0.00479943	N	AM
Cheng et al	2016	Acer negundo	0.32	0.0149011	0.00174137	NP	AM
Cheng et al	2016	Acer negundo	0.32	0.00201705	0.00162119	NP	AM
Cheng et al	2016	Liriodendron tulipifera	0.86	0.0235483	0.000685023	NP	AM
Cheng et al	2016	Liriodendron tulipifera	0.86	0.0158196	0.000798646	NP	AM
Liu et al	2019	Acer fabri	0.207175	0.0593775	0.0159441	NP	AM
Liu et al	2019	Schima superba	0.203775	-0.386857	0.0300827	NP	AM
Liu et al	2019	Choerospondias axillaris	0.260613	0.0947284	0.00533992	NP	AM
Liu et al	2019	Liquidambar formosana	0.270798	-0.108176	0.023313	NP	AM
Liu et al	2019	Elaeocarpus glabripetalus	0.286038	-0.571323	0.0186595	NP	AM
Liu et al	2019	Alniphyllum fortunei	0.3107	0.117327	0.029657	NP	AM
Liu et al	2019	Cinnamomum porrectum	0.291133	-0.180777	0.0108761	NP	AM
Liu et al	2019	Cinnamomum austrosinense	0.3604	-0.16192	0.012122	NP	AM
Liu et al	2019	Machilus oculodracontis	0.564133	0.108262	0.0258048	NP	AM
Liu et al	2019	Manglietia yuyuanensis	0.586394	0.0632608	0.0045911	NP	AM
Liu et al	2019	Neolitsea phanerophlebia	0.593812	0.144648	0.0181151	NP	AM
Liu et al	2019	Cunninghamia lanceolata	0.6774	-0.0669121	0.0069471	NP	AM
Liu et al	2019	Taxus chinensis	0.7539	-0.187801	0.01103	NP	AM
Chen et al	2016	Acer saccharum	0.29	0.119115	0.004019	OF	AM
Chen et al	2016	Acer negundo	0.29	0.125684	0.00684365	OF	AM
Chen et al	2016	Prunus serotina	0.35	-0.0176335	0.00749386	OF	AM
Chen et al	2016	Juglans nigra	0.36	0.0777204	0.0074392	OF	AM
Chen et al	2016	Sassafras albidum	0.61	-0.0242583	0.00369352	OF	AM
Chen et al	2016	Liriodendron tulipifera	0.83	0.010471	0.00362861	OF	AM
Cheng et al	2016	Acer negundo	0.32	0.198139	0.00152809	OF	AM
Cheng et al	2016	Liriodendron tulipifera	0.86	0.211942	0.000769537	OF	AM
Liu et al	2019	Acer fabri	0.182212	0.0639777	0.0170667	P	AM
Liu et al	2019	Schima superba	0.194375	-0.0479144	0.0134088	P	AM
Liu et al	2019	Choerospondias axillaris	0.284787	0.0503557	0.0041904	P	AM
Liu et al	2019	Liquidambar formosana	0.244487	0.123707	0.0266907	P	AM
Liu et al	2019	Elaeocarpus glabripetalus	0.29875	-0.0717771	0.02012	P	AM
Liu et al	2019	Alniphyllum fortunei	0.298175	0.0803849	0.0261683	P	AM
Liu et al	2019	Cinnamomum porrectum	0.336087	-0.059474	0.0075673	P	AM
Liu et al	2019	Cinnamomum austrosinense	0.3365	0.0868499	0.00707496	P	AM
Liu et al	2019	Machilus oculodracontis	0.542362	0.0133867	0.0179698	P	AM
Liu et al	2019	Manglietia yuyuanensis	0.527012	0.045897	0.00315905	P	AM
Liu et al	2019	Neolitsea phanerophlebia	0.558025	0.188163	0.0133347	P	AM
Liu et al	2019	Cunninghamia lanceolata	0.693194	0.250009	0.0122487	P	AM
Liu et al	2019	Taxus chinensis	0.6698	-0.169784	0.0189963	P	AM
Cheng et al	2016	Quercus alba	0.191	-0.0269652	0.00230098	NP	ECM
Cheng et al	2016	Quercus alba	0.191	0.127272	0.00308799	NP	ECM
Cheng et al	2016	Pinus strobus	0.762	0.0556552	0.00444777	NP	ECM
Cheng et al	2016	Pinus strobus	0.762	0.129934	0.00666402	NP	ECM
Chen et al	2016	Betula alleghaniensis	0.24	0.625	0.191686	OF	ECM
Chen et al	2016	Carya glabra	0.19	0.404959	0.0599884	OF	ECM
Chen et al	2016	Picea rubens	0.45	-0.447514	0.0535487	OF	ECM
Chen et al	2016	Pinus strobus	0.63	-0.550562	0.131024	OF	ECM
Chen et al	2016	Pinus virginiana	0.46	0.0545457	0.143619	OF	ECM
Chen et al	2016	Quercus alba	0.19	0.296874	0.136516	OF	ECM
Chen et al	2016	Quercus rubra	0.21	0.285715	0.204911	OF	ECM
Cheng et al	2016	Quercus alba	0.191	0.569213	0.00275138	OF	ECM
Cheng et al	2016	Pinus strobus	0.762	0.749396	0.00425763	OF	ECM

## Sheet: Dataset 2_MC of woody
Study	Year	Species	Root diameter (mm)	ln(RR)	VEZ	Nutrient types	Mycorrhizal types
Liu et al	2019	Acer fabri	0.211881	-0.361553	0.011198	N	AM
Liu et al	2019	Schima superba	0.307903	-0.52084	0.00111469	N	AM
Liu et al	2019	Choerospondias axillaris	0.574227	-0.230522	0.00378961	N	AM
Liu et al	2019	Liquidambar formosana	0.198125	-0.384431	0.00792512	N	AM
Liu et al	2019	Elaeocarpus glabripetalus	0.269092	-0.10203	0.000954469	N	AM
Liu et al	2019	Alniphyllum fortunei	0.508312	0.631373	0.00814253	N	AM
Liu et al	2019	Cinnamomum porrectum	0.733781	-0.522884	0.00411661	N	AM
Liu et al	2019	Cinnamomum austrosinense	0.244487	0.231528	0.00506288	N	AM
Liu et al	2019	Machilus oculodracontis	0.3365	-0.0176047	0.00356521	N	AM
Liu et al	2019	Manglietia yuyuanensis	0.693194	-0.4339	0.036578	N	AM
Liu et al	2019	Neolitsea phanerophlebia	0.260613	-0.0610245	0.000207037	N	AM
Liu et al	2019	Cunninghamia lanceolata	0.291133	-0.84089	0.000604959	N	AM
Liu et al	2019	Taxus chinensis	0.593812	-0.222081	0.000215442	N	AM
Cheng et al	2016	Acer negundo	0.33	0.552201	0.13494	NP	AM
Cheng et al	2016	Liriodendron tulipifera	0.94	0.10896	0.0212438	NP	AM
Eissenstat et al	2015	Liriodendron tulipifera	0.67	-0.0940093	0.0380166	NP	AM
Eissenstat et al	2015	Juglans nigra	0.46	0.0198058	0.0495876	NP	AM
Eissenstat et al	2015	Fraxinus americana	0.43	-0.540118	0.0374022	NP	AM
Eissenstat et al	2015	Acer rubrum	0.33	-1.20835	0.113324	NP	AM
Eissenstat et al	2015	Ulmus americana	0.24	-0.763421	0.0412257	NP	AM
Liu et al	2019	Acer fabri	0.26385	-0.3845	0.00758428	NP	AM
Liu et al	2019	Schima superba	0.413513	-0.602214	0.0115749	NP	AM
Liu et al	2019	Choerospondias axillaris	0.636456	-1.02361	0.000771721	NP	AM
Liu et al	2019	Liquidambar formosana	0.25775	-0.214071	0.00207193	NP	AM
Liu et al	2019	Elaeocarpus glabripetalus	0.316063	-0.660982	0.00430146	NP	AM
Liu et al	2019	Alniphyllum fortunei	0.59765	-0.952623	0.00778175	NP	AM
Liu et al	2019	Cinnamomum porrectum	0.194375	-0.53726	0.00366915	NP	AM
Liu et al	2019	Cinnamomum austrosinense	0.298175	-0.519376	0.00158467	NP	AM
Liu et al	2019	Machilus oculodracontis	0.527012	-0.556481	0.0173859	NP	AM
Liu et al	2019	Manglietia yuyuanensis	0.207175	-0.45035	0.000491026	NP	AM
Liu et al	2019	Neolitsea phanerophlebia	0.286038	-1.13784	0.000120978	NP	AM
Liu et al	2019	Cunninghamia lanceolata	0.564133	-0.442981	0.00806129	NP	AM
Liu et al	2019	Taxus chinensis	0.7539	-0.319259	0.000812225	NP	AM
Caplan et al	2017	Berberis thunbergii	0.285417	0.208501	0.032846	OF	AM
Caplan et al	2017	Lonicera maackii	0.254812	0.0907429	0.00173616	OF	AM
Caplan et al	2017	Rubus phoenicolasius	0.221003	0.0806253	0.0171201	OF	AM
Caplan et al	2017	Rubus allegheniensis	0.194844	-0.0594485	0.0350434	OF	AM
Caplan et al	2017	Vibernum dentatum	0.535313	0.0659133	0.00583995	OF	AM
Caplan et al	2017	Lindera benzoin	0.702595	0.0534275	0.00909938	OF	AM
Chen et al	2016	Acer saccharum	0.29	0.13136	0.00541621	OF	AM
Chen et al	2016	Acer negundo	0.29	0.207912	0.00106313	OF	AM
Chen et al	2016	Prunus serotina	0.35	0.154112	0.0148411	OF	AM
Chen et al	2016	Juglans nigra	0.36	2.81116e-06	0.000737113	OF	AM
Chen et al	2016	Sassafras albidum	0.61	0.366914	0.00108807	OF	AM
Chen et al	2016	Liriodendron tulipifera	0.83	0.0148077	0.00016096	OF	AM
Cheng et al	2016	Acer negundo	0.33	-0.407546	0.366211	OF	AM
Cheng et al	2016	Liriodendron tulipifera	0.94	-0.361123	0.0789811	OF	AM
Liu et al	2019	Acer fabri	0.2489	-1.47028	0.0286943	P	AM
Liu et al	2019	Schima superba	0.33425	-0.0242255	0.0119563	P	AM
Liu et al	2019	Choerospondias axillaris	0.551322	-0.886814	0.0173742	P	AM
Liu et al	2019	Liquidambar formosana	0.1952	-0.482279	0.0209749	P	AM
Liu et al	2019	Elaeocarpus glabripetalus	0.294262	0.118176	0.000233778	P	AM
Liu et al	2019	Alniphyllum fortunei	0.531737	-0.130857	0.0077945	P	AM
Liu et al	2019	Cinnamomum porrectum	0.182212	0.4789	0.0030779	P	AM
Liu et al	2019	Cinnamomum austrosinense	0.29875	0.630276	0.000457716	P	AM
Liu et al	2019	Machilus oculodracontis	0.542362	0.0996714	0.00904322	P	AM
Liu et al	2019	Manglietia yuyuanensis	0.6698	-1.12485	0.0100546	P	AM
Liu et al	2019	Neolitsea phanerophlebia	0.270798	-0.279278	0.000773559	P	AM
Liu et al	2019	Cunninghamia lanceolata	0.3604	-0.109024	0.00758195	P	AM
Liu et al	2019	Taxus chinensis	0.6774	-0.321639	0.000215442	P	AM
Cheng et al	2016	Quercus alba	0.22	-0.197429	0.0641117	NP	ECM
Cheng et al	2016	Pinus strobus	0.73	0.328877	0.0177464	NP	ECM
Chen et al	2016	Carya glabra	0.19	-0.165829	0.000468105	OF	ECM
Chen et al	2016	Quercus alba	0.19	0.0471655	0.000372596	OF	ECM
Chen et al	2016	Quercus rubra	0.21	-0.0760482	0.00045706	OF	ECM
Chen et al	2016	Betula alleghaniensis	0.24	-0.109083	0.000935289	OF	ECM
Chen et al	2016	Picea rubens	0.45	0.562907	0.00132298	OF	ECM
Chen et al	2016	Pinus virginiana	0.46	-0.51218	0.00158406	OF	ECM
Chen et al	2016	Pinus strobus	0.63	0.0293854	0.000257732	OF	ECM
Cheng et al	2016	Quercus alba	0.22	0.0644927	0.0429855	OF	ECM
Cheng et al	2016	Pinus strobus	0.73	0.169616	0.0454271	OF	ECM
